# Supplementary material for: An efficient multichannel probe to detect anions in different media and its real application in human blood plasma
Source: Royal Society of Chemistry journal article supplement (doi:10.1039/c4ra02388a), 2014-01-01
Supplement: c4ra02388a1.pdf [file c4ra02388a1.pdf]

## **Supporting information**

### **An efficient multichannel probe to detect anions in different medium and its real application in human blood plasma**

Syed S. Razi, Rashid Ali, Priyanka Srivastava, Mohammad Shahid and Arvind Misra\*

*Department of Chemistry, Faculty of Science, Banaras Hindu University,  
Varanasi – 221 005. INDIA.*

*Corresponding author: [arvindmisra2003@yahoo.com](mailto:arvindmisra2003@yahoo.com); [amisra@bhu.ac.in](mailto:amisra@bhu.ac.in)  
Tel: +91-542-6702503; Fax: +91-0542-2368127, 2368175.*

**Figure S1:**  $^1\text{H}$  NMR spectrum of **2** in  $\text{CDCl}_3$ .

**Figure S2:**  $^1\text{H}$  NMR spectrum of **3** in  $\text{CDCl}_3$ .

**Figure S3:**  $\text{D}_2\text{O}$  exchange NMR spectrum of **3** in  $\text{CDCl}_3$ .

**Figure S4:** FTIR spectrum of **3**.

**Figure S5:**  $^{13}\text{C}$  NMR spectrum of **3** in  $\text{CDCl}_3$ .

**Figure S6:** Mass spectrum (ESI-MS) of **3**.

**Figure S7:**  $^1\text{H}$  NMR spectrum of **4** in  $\text{CDCl}_3$ .

**Figure S8:** FTIR spectrum of **4**.

**Figure S9:**  $^{13}\text{C}$  NMR spectrum of **4** in  $\text{CDCl}_3$ .

**Figure S10:** Solvatochromic behavior of **3** ( $10\ \mu\text{M}$ ) in (a) absorption, (b) emission spectra and table of absorption and emission data and (c) Absorption spectra of **3** ( $10\ \mu\text{M}$ ) with TBAOH (10 equiv) in ACN. Inset: change in color of **3** after addition of TBAOH.

**Figure S11:** (a) Absorption titration spectra of **3** ( $10\ \mu\text{M}$ ) with  $\text{AcO}^-$  (0-5 equiv). Inset: Job's plot and (b) Benesi-Hildebrand plot.

**Figure S12:** Change in absorption spectra of **4** ( $10\ \mu\text{M}$ ) with different anions (10 equiv) as  $\text{F}^-$ ,  $\text{Cl}^-$ ,  $\text{Br}^-$ ,  $\text{I}^-$ ,  $\text{S}^{2-}$ ,  $\text{N}_3^-$ ,  $\text{SCN}^-$ ,  $\text{AcO}^-$ ,  $\text{CN}^-$ ,  $\text{H}_2\text{PO}_4^-$  (as their tetrabutylammonium salts) in MeCN. Inset: Colorimetric response of **3** (A) ( $10\ \mu\text{M}$ ) with different anions (10 equiv) (B) ( $10^{-2}\ \text{M}$ ) with different anions ( $10^{-2}\ \text{M}$ ) as  $\text{F}^-$ ,  $\text{Cl}^-$ ,  $\text{Br}^-$ ,  $\text{I}^-$ ,  $\text{S}^{2-}$ ,  $\text{N}_3^-$ ,  $\text{SCN}^-$ ,  $\text{AcO}^-$ ,  $\text{CN}^-$ ,  $\text{H}_2\text{PO}_4^-$  and  $\text{HS}^-$  (as their sodium salts) in aqueous medium.

**Figure S13:** Absorption and emission spectra of **3** (a, b) and **4** (c, d) at different pHs.

**Figure S14:** Interference studies illustrating change in absorption and emission spectra upon addition of different anions (200 equiv) to a solution of **3**+ $\text{CN}^-$  and **4**+ $\text{CN}^-$  ( $10\ \mu\text{M}$ ) in aqueous medium. Images: Change in color of probes **3** and **4** upon interaction with different anions in aqueous medium (UV = 365 nm).

**Figure S15:**  $^1\text{H}$  NMR titration spectrum of **3** with 0.1 equiv of  $\text{F}^-$  in  $\text{CDCl}_3$ .

**Figure S16:**  $^1\text{H}$  NMR titration spectrum of **3** with 0.2 equiv of  $\text{F}^-$  in  $\text{CDCl}_3$ .

**Figure S17:**  $^1\text{H}$  NMR titration spectrum of **3** with 0.3 equiv of  $\text{F}^-$  in  $\text{CDCl}_3$ .

**Figure S18:**  $^1\text{H}$  NMR titration spectrum of **3** with 0.4 equiv of  $\text{F}^-$  in  $\text{CDCl}_3$ .

**Figure S19:**  $^1\text{H}$  NMR titration spectrum of **3** with 0.6 equiv of  $\text{F}^-$  in  $\text{CDCl}_3$ .

**Figure S20:**  $^1\text{H}$  NMR titration spectrum of **3** with 0.8 equiv of  $\text{F}^-$  in  $\text{CDCl}_3$ .

**Figure S21:**  $^1\text{H}$  NMR titration spectrum of **3** with 1.2 equiv of  $\text{F}^-$  in  $\text{CDCl}_3$ .

**Figure S22:** Stacked  $^1\text{H}$  NMR titration spectra of **3** upon addition of  $\text{AcO}^-$  (0, 0.1, 0.2, 0.3, and 0.4 equiv) in  $\text{CDCl}_3$ .

**Figure S23:**  $^1\text{H}$  NMR titration spectrum of **3** with 0.1 equiv of  $\text{AcO}^-$  in  $\text{CDCl}_3$ .

**Figure S24:**  $^1\text{H}$  NMR titration spectrum of **3** with 0.2 equiv of  $\text{AcO}^-$  in  $\text{CDCl}_3$ .

**Figure S25:**  $^1\text{H}$  NMR titration spectrum of **3** with 0.3 equiv of  $\text{AcO}^-$  in  $\text{CDCl}_3$ .

**Figure S26:**  $^1\text{H}$  NMR titration spectrum of **3** with 0.4 equiv of  $\text{AcO}^-$  in  $\text{CDCl}_3$ .

**Figure S27:**  $^{13}\text{C}$  NMR spectrum of adduct, **3-CN** $^-$  in  $\text{CDCl}_3/\text{DMSO}-d_6$ .

**Figure S28:**  $^{13}\text{C}$  NMR spectrum of adduct, **4-CN** $^-$ .

**Figure S29:** FTIR spectrum of adduct, **3-CN** $^-$ .

**Figure S30:** FTIR spectrum of adduct, **4-CN** $^-$ .

**Figure S31:** Mass spectrum (ESI-MS) of **3-CN**.

**Figure S32:**  $^1\text{H}$  NMR spectrum of adduct, **3-CN** $^-$ .

**Figure S33:**  $^1\text{H}$  NMR spectrum of adduct, **4-CN** $^-$ . Inset: stacked  $^1\text{H}$  NMR spectra of **4** and **4-CN** $^-$ .

**Figure S34:**  $\text{D}_2\text{O}$  exchange  $^1\text{H}$  NMR spectrum of adduct, **4-CN** $^-$ .

**Figure S35:** (a) Calibration curve for **3**, (b) calibration sensitivity for  $\text{CN}^-$  in  $\text{H}_2\text{O}$ .

**Figure S36:** (a) Calibration curve for **3**, (b) and (c) calibration sensitivities for  $\text{F}^-$  and  $\text{AcO}^-$  in MeCN.

**Figure S37:** (a) Calibration curve for **3**, (b) calibration sensitivity for  $\text{CN}^-$  in human blood plasma.

**Figure S38:** Stacked  $^1\text{H}$  NMR titration spectra of **3** upon addition of  $\text{F}^-$  (0, 0.2, 0.4 and 0.6, equiv) in  $\text{DMSO}-d_6$ .

**Figure S39:**  $^1\text{H}$  NMR spectrum of **3** in  $\text{DMSO}-d_6$ .

**Figure S40:**  $^1\text{H}$  NMR titration spectrum of **3** with 0.2 equiv of  $\text{F}^-$  in  $\text{DMSO}-d_6$ .

**Figure S41:**  $^1\text{H}$  NMR titration spectrum of **3** with 0.4 equiv of  $\text{F}^-$  in  $\text{DMSO}-d_6$ .

**Figure S42:**  $^1\text{H}$  NMR titration spectrum of **3** with 0.6 equiv of  $\text{F}^-$  in  $\text{DMSO}-d_6$ .

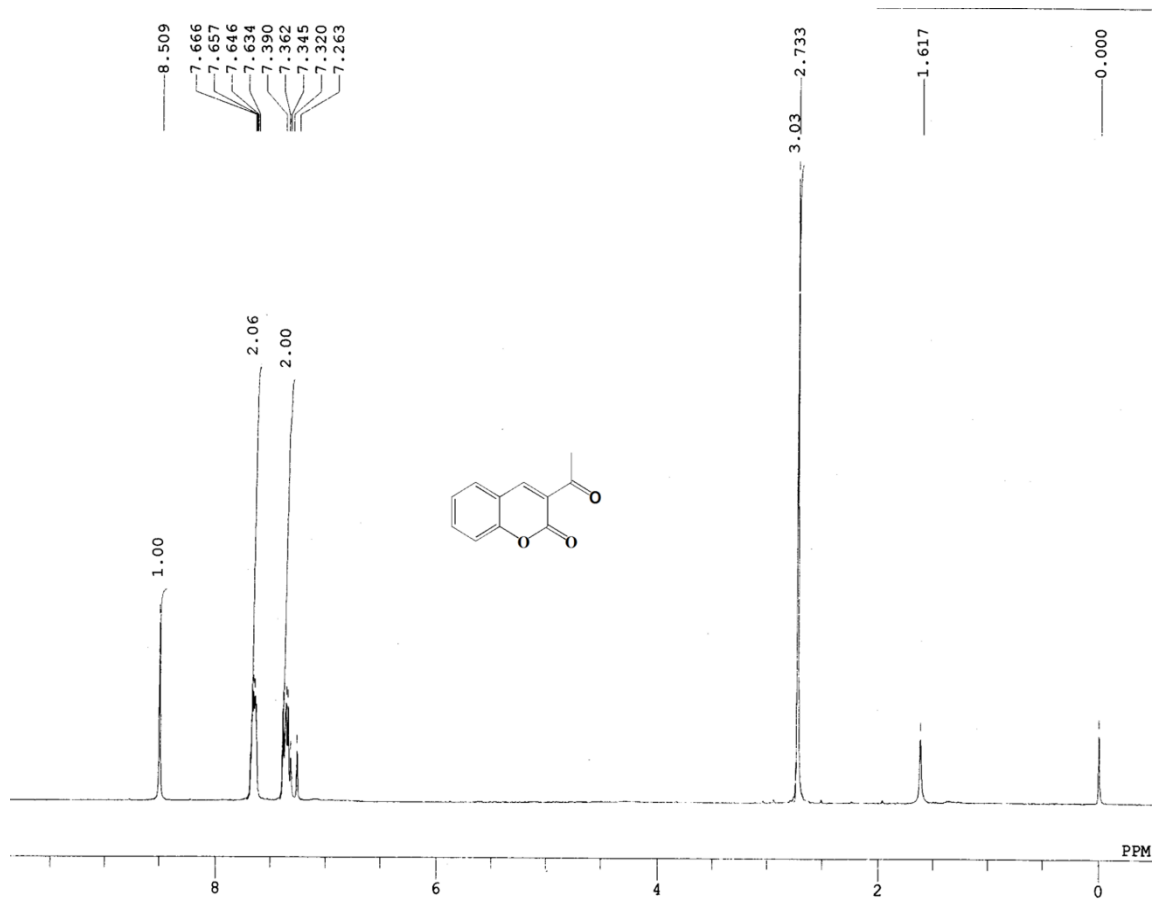

**Figure S1:**  $^1\text{H}$  NMR spectrum of **2** in  $\text{CDCl}_3$ .

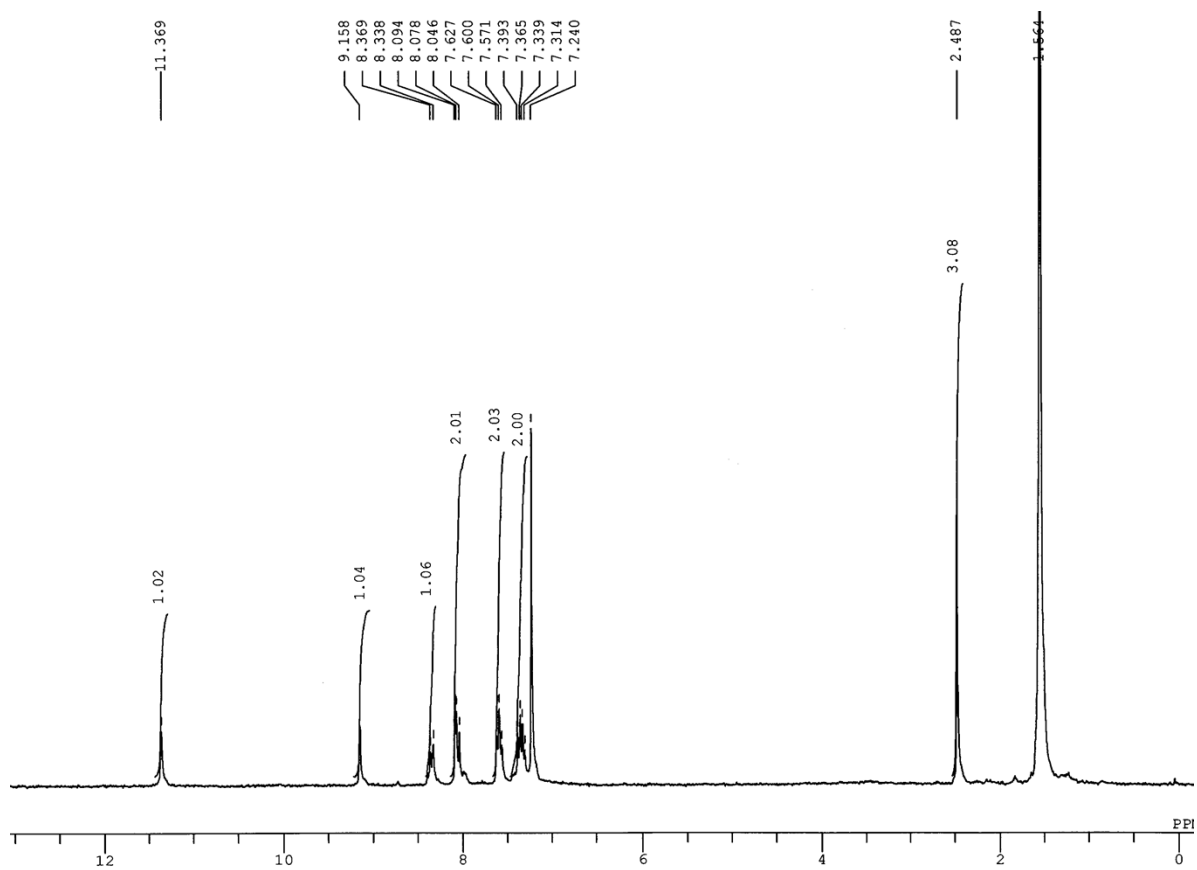

**Figure S2:** <sup>1</sup>H NMR spectrum of **3** in CDCl<sub>3</sub>.

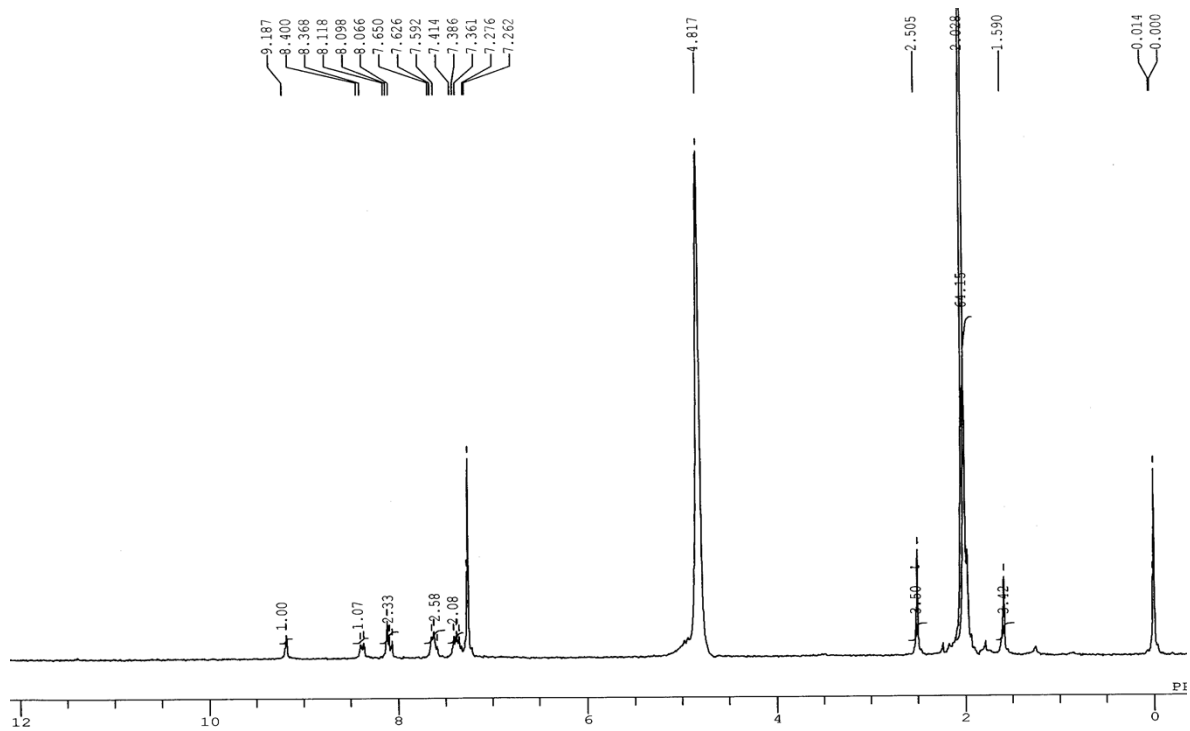

**Figure S3:** D<sub>2</sub>O exchange NMR spectrum of **3** in CDCl<sub>3</sub>.

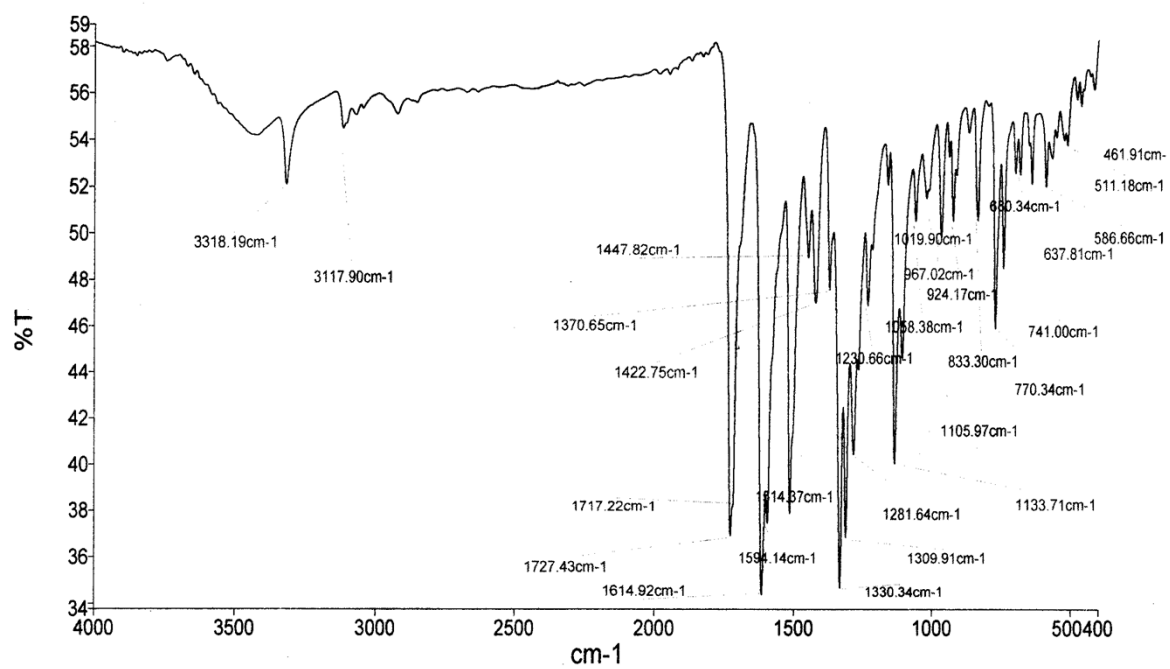

**Figure S4:** FTIR spectrum of **3**.

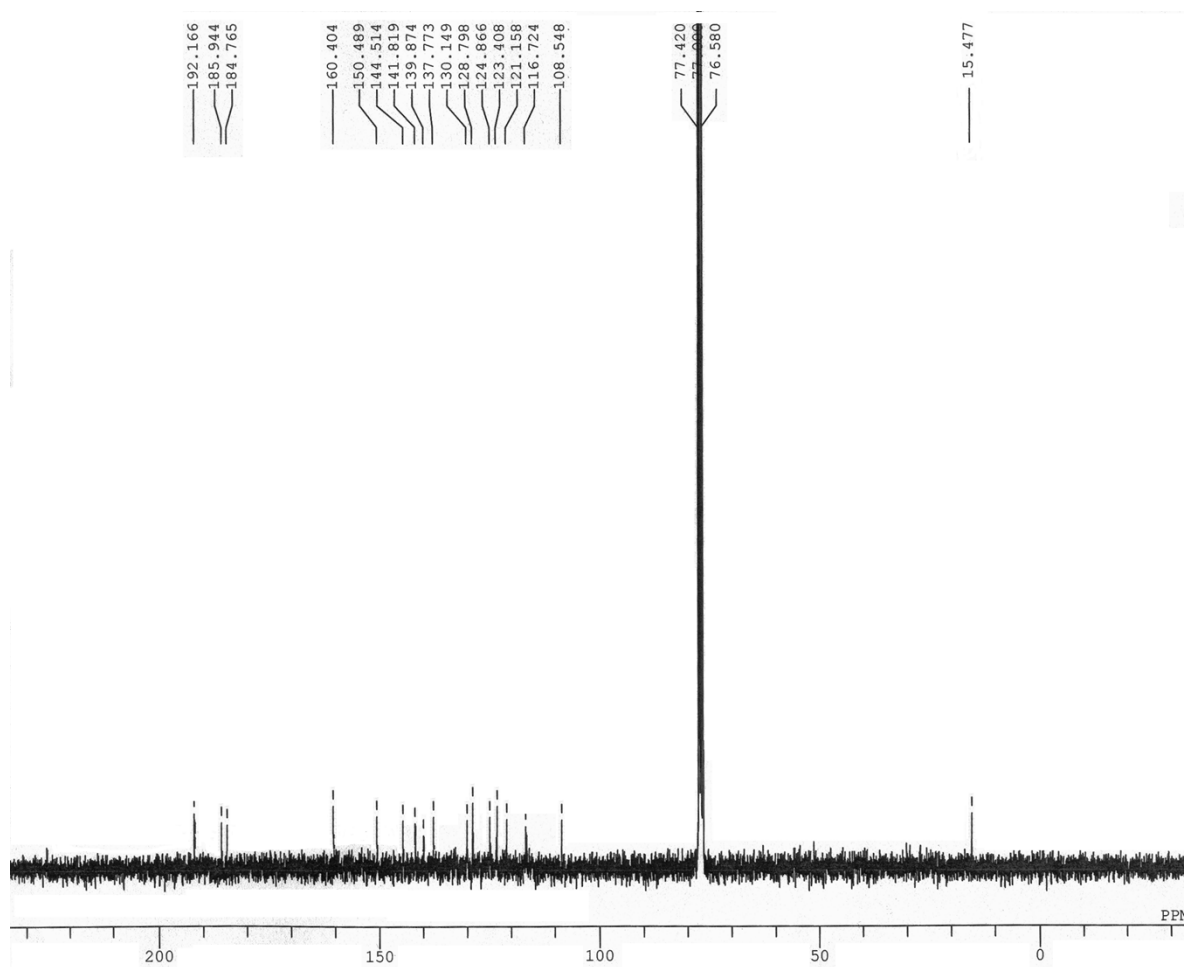

**Figure S5:** <sup>13</sup>C NMR spectrum of **3** in CDCl<sub>3</sub>.

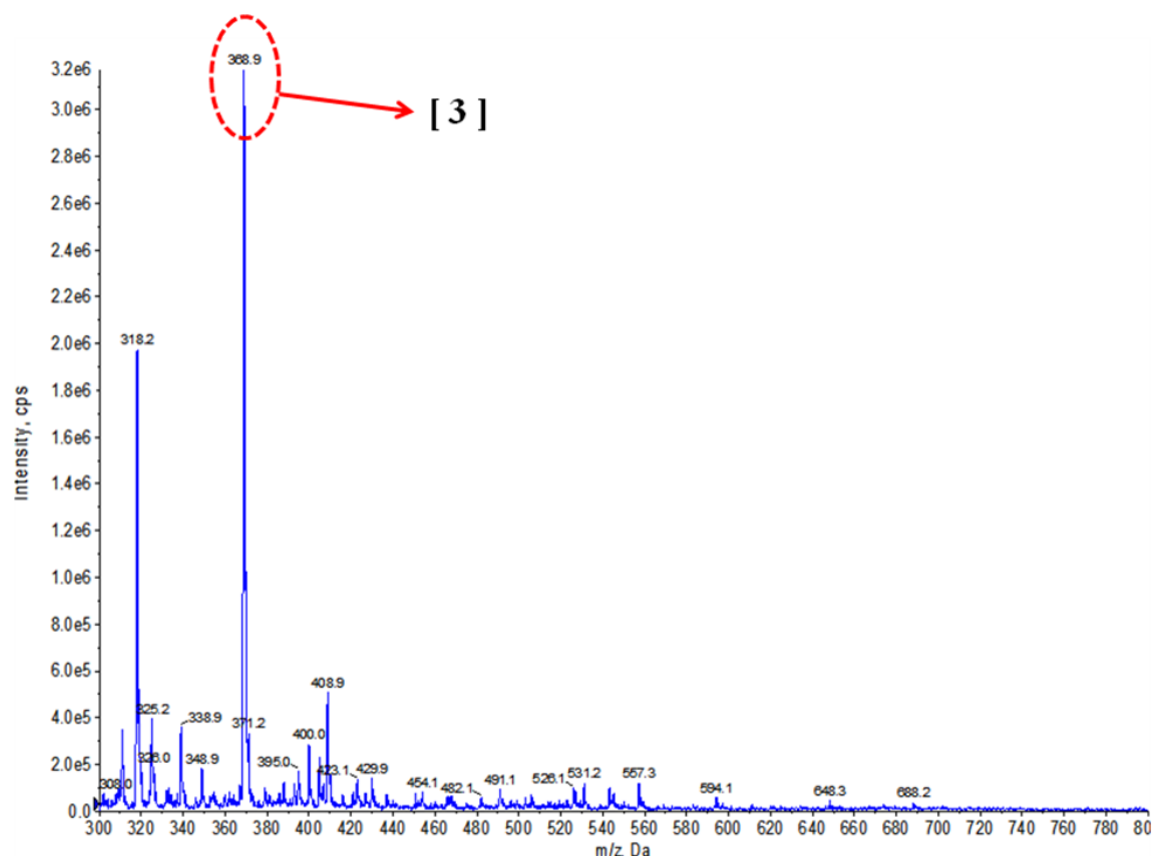

**Figure S6:** Mass spectrum (ESI-MS) of **3**.



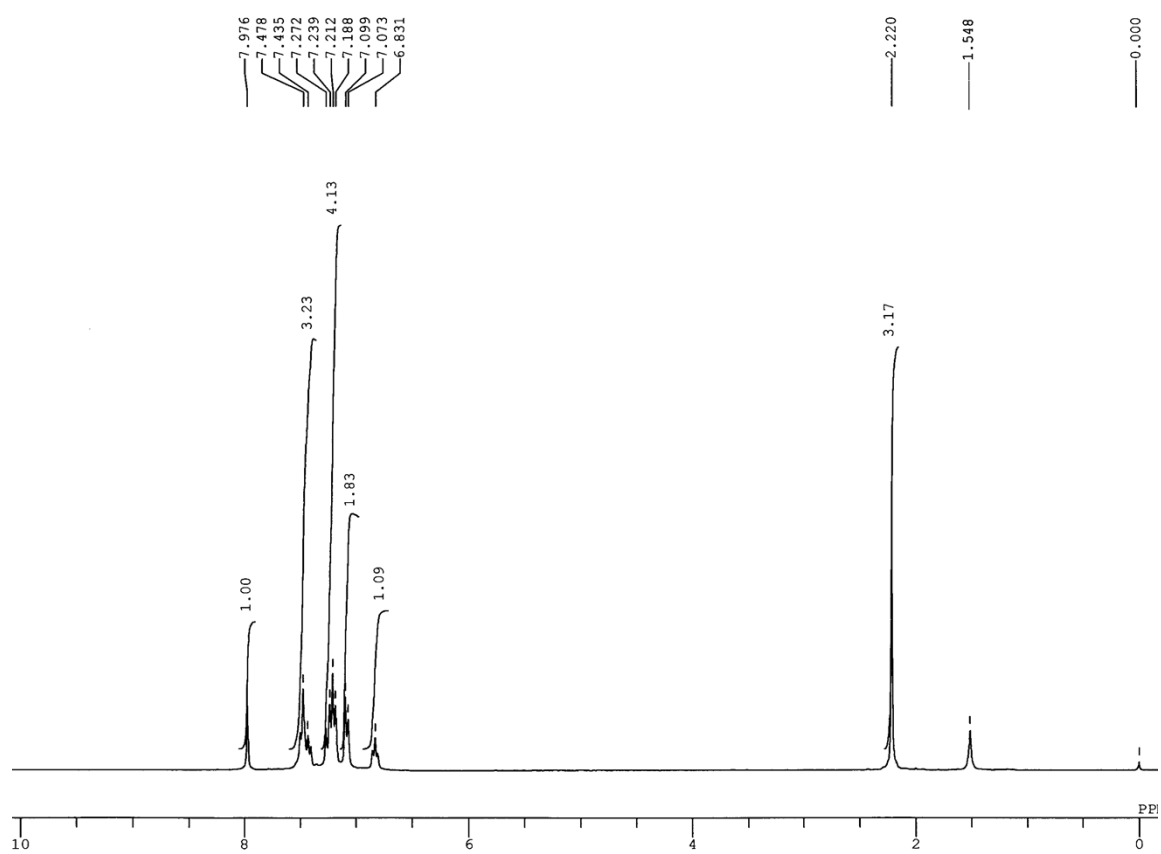

**Figure S7:** <sup>1</sup>H NMR spectrum of **4** in CDCl<sub>3</sub>.

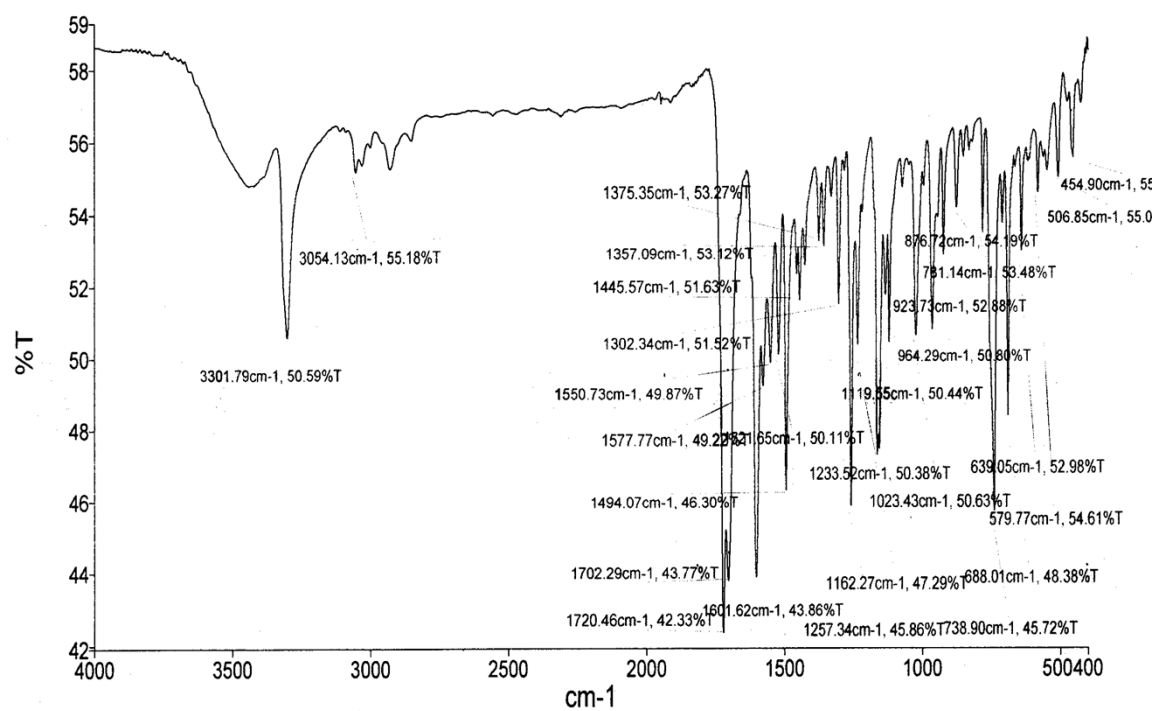

**Figure S8:** FTIR spectrum of **4**.

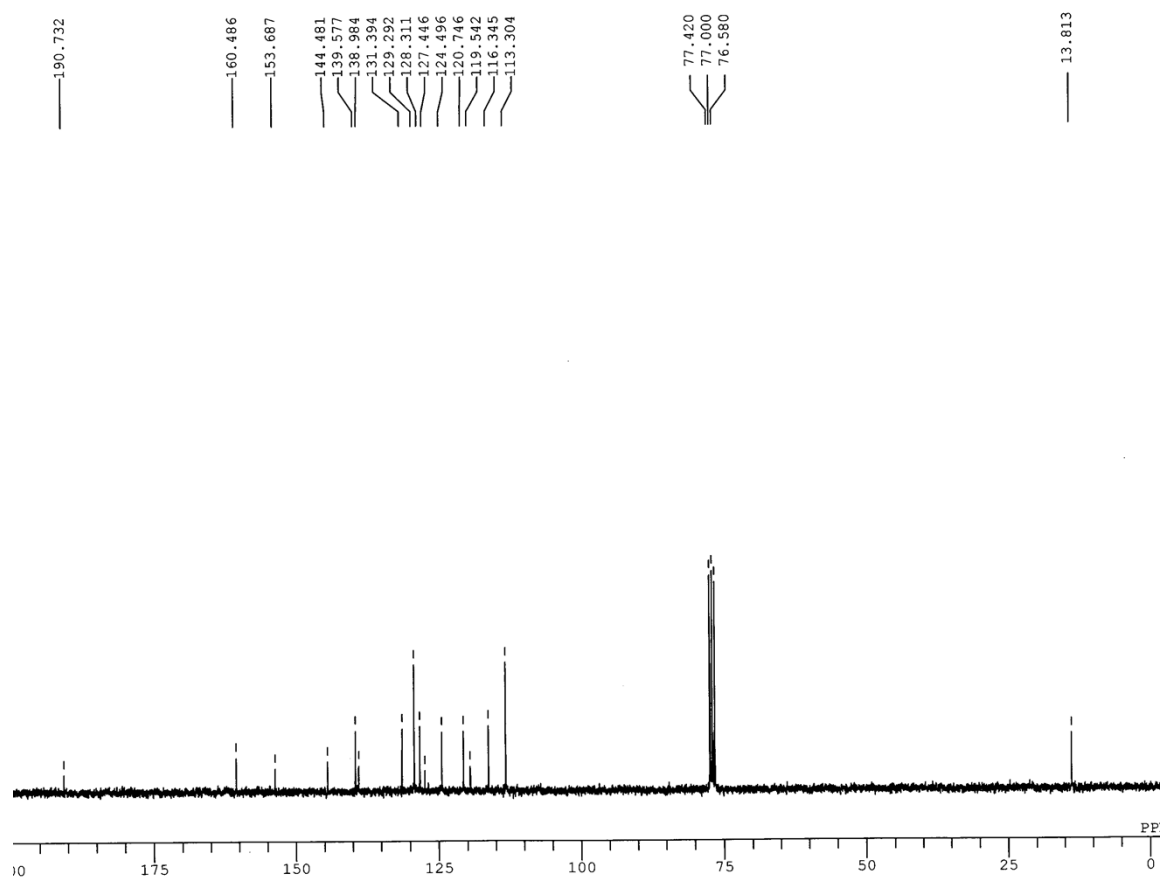

**Figure S9:** <sup>13</sup>C NMR spectrum of **4** in CDCl<sub>3</sub>.

Table S1

| Solvents | $\lambda_{Abs}$<br>(in nm) ( $\epsilon = \text{M}^{-1} \text{cm}^{-1}$ ) | $\lambda_{em}$<br>(in nm) |
|----------|--------------------------------------------------------------------------|---------------------------|
| ACN      | 378 ( $2.9 \times 10^4$ )                                                | 435                       |
| DMSO     | 389 ( $2.86 \times 10^4$ )                                               | 450                       |
| THF      | 379 ( $3.22 \times 10^4$ )                                               | 438                       |
| MeOH     | 381 ( $3.0 \times 10^4$ )                                                | 429                       |
| DCM      | 380 ( $2.82 \times 10^4$ )                                               | 438                       |
| Benzene  | 382 ( $3.49 \times 10^4$ )                                               | 435                       |

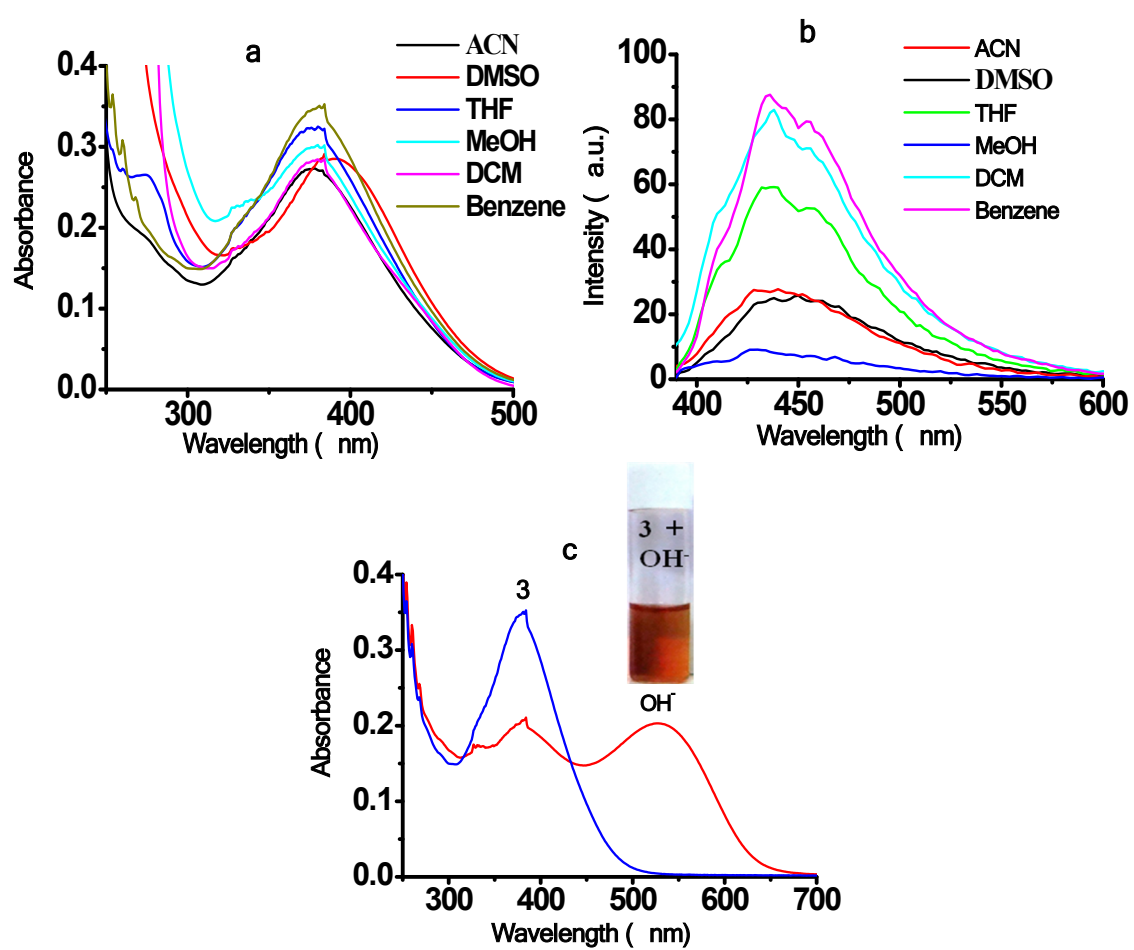

**Figure S10:** Solvatochromic behavior of **3** (10  $\mu\text{M}$ ) in (a) absorption, (b) emission spectra and table of absorption and emission data and (c) Absorption spectra of **3** (10  $\mu\text{M}$ ) with TBAOH (10 equiv) in ACN. Inset: change in color of **3** after addition of TBAOH.

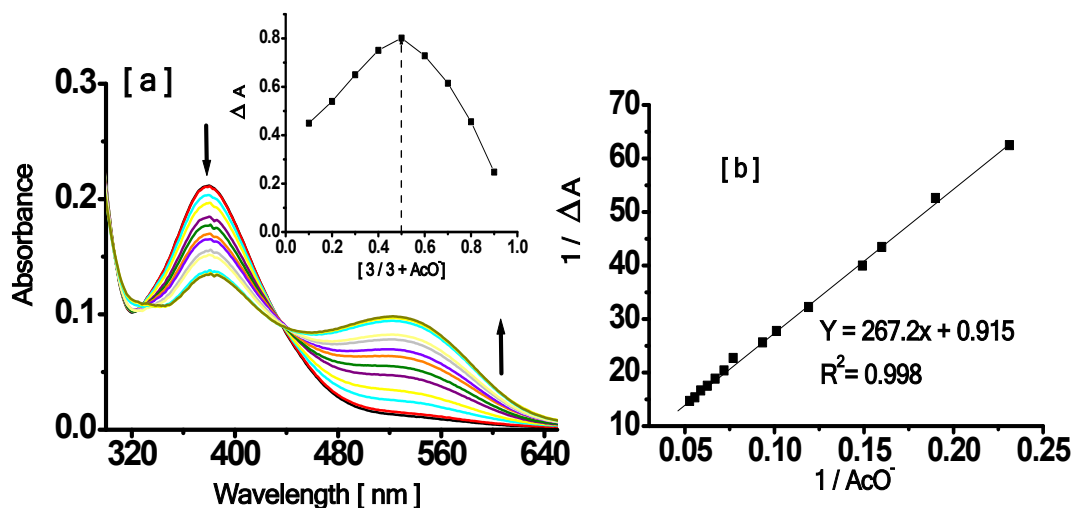

**Figure S11:** (a) Absorption titration spectra of **3** (10  $\mu\text{M}$ ) with  $\text{AcO}^-$  (0-5 equiv) ions. Inset: Job's plot and (b) Benesi-Hildebrand plot.

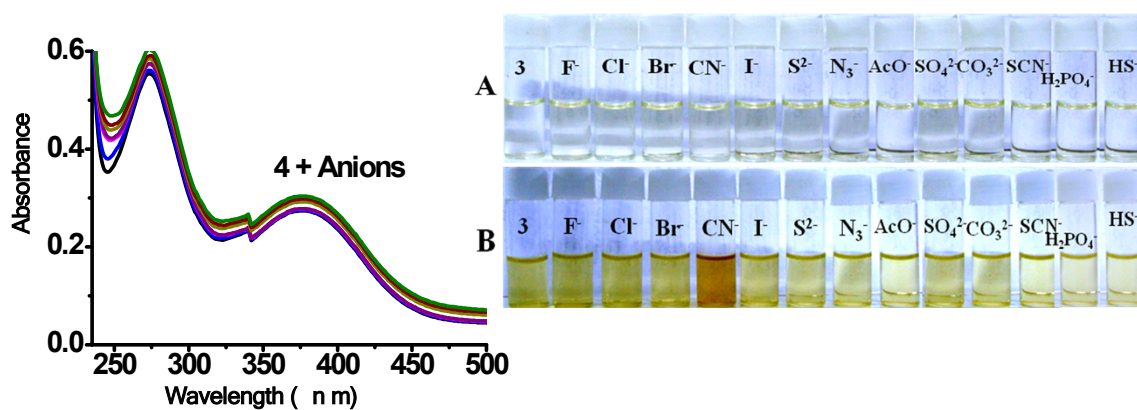

**Figure S12:** Change in absorption spectra of **4** (10  $\mu\text{M}$ ) with different anions (10 equiv) as  $\text{F}^-$ ,  $\text{Cl}^-$ ,  $\text{Br}^-$ ,  $\text{I}^-$ ,  $\text{S}^{2-}$ ,  $\text{N}_3^-$ ,  $\text{SCN}^-$ ,  $\text{AcO}^-$ ,  $\text{CN}^-$ ,  $\text{H}_2\text{PO}_4^-$  (as their tetrabutylammonium salts) in MeCN. Inset: Colorimetric response of **3** (A) (10  $\mu\text{M}$ ) with different anions (10 equiv) (B) (10 mM) with different anions (10 mM) as  $\text{F}^-$ ,  $\text{Cl}^-$ ,  $\text{Br}^-$ ,  $\text{I}^-$ ,  $\text{S}^{2-}$ ,  $\text{N}_3^-$ ,  $\text{SCN}^-$ ,  $\text{AcO}^-$ ,  $\text{CN}^-$ ,  $\text{H}_2\text{PO}_4^-$  and  $\text{HS}^-$  (as their sodium salts) in aqueous medium.

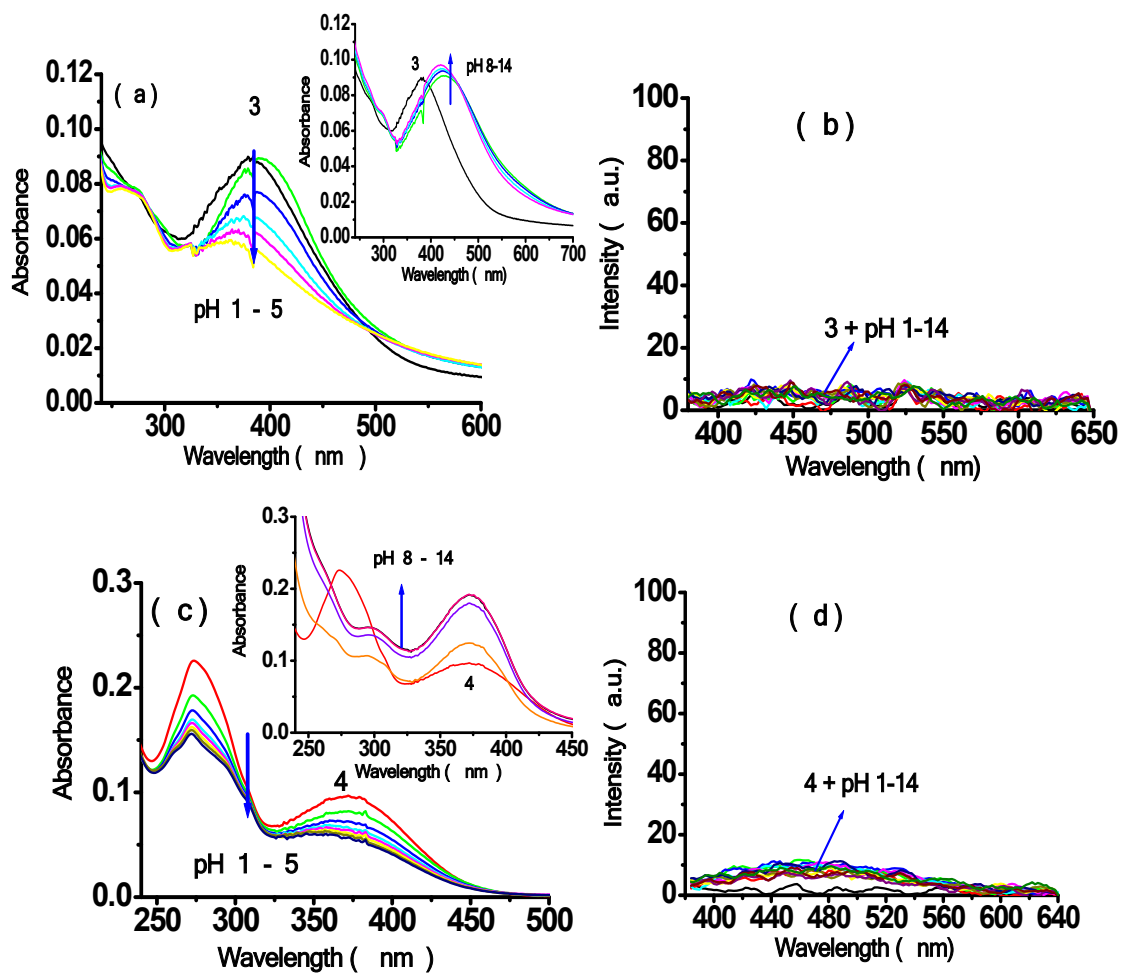

**Figure S13:** Absorption and emission spectra of **3** (a, b) and **4** (c, d) at different pHs.

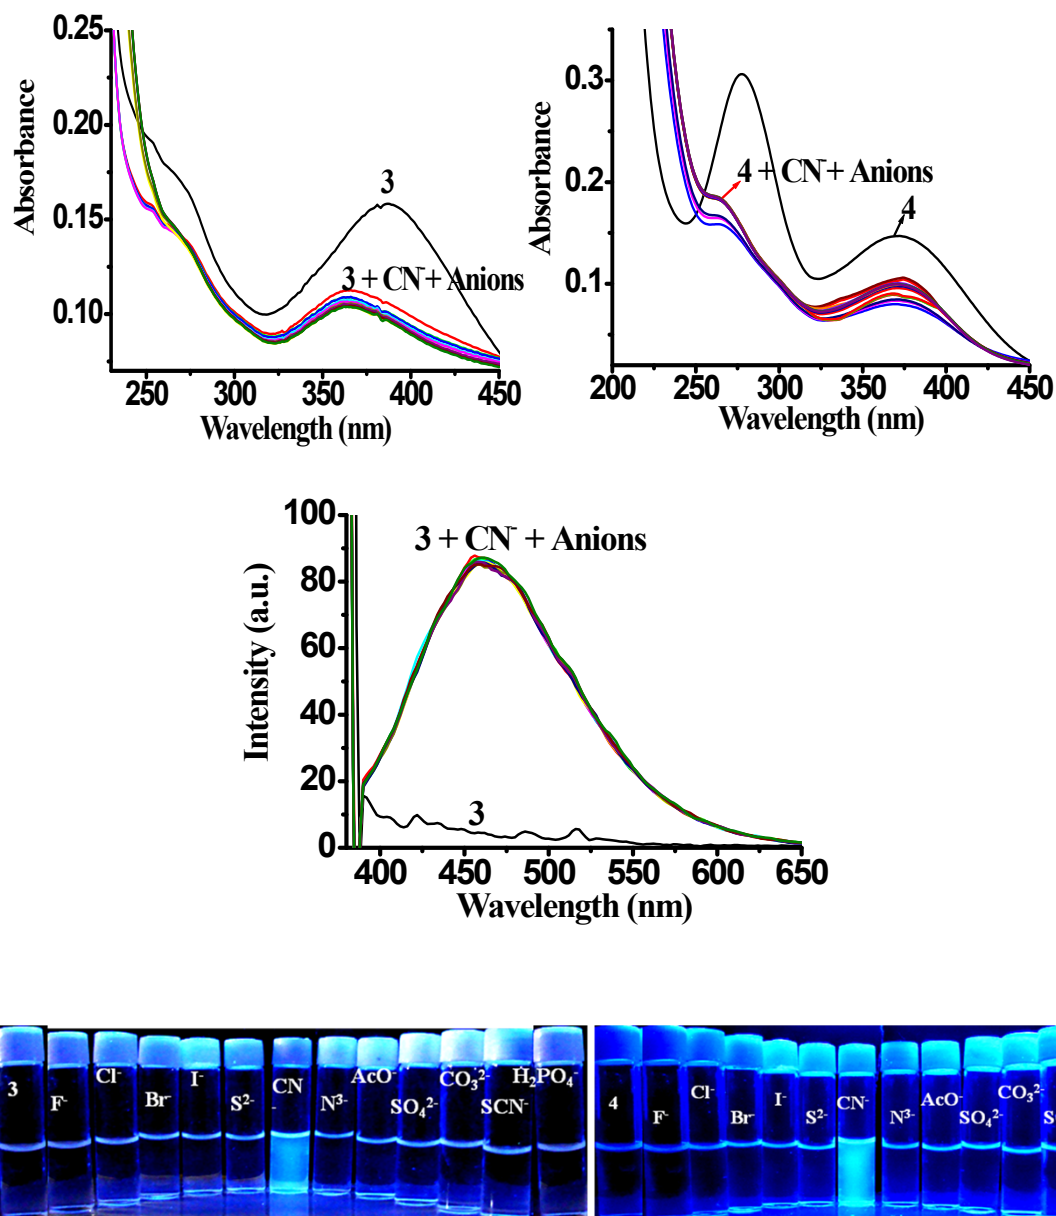

**Figure S14:** Interference studies illustrating change in absorption and emission spectra upon addition of different anions (200 equiv) to a solution of **3**+CN<sup>-</sup> and **4**+CN<sup>-</sup> (10  $\mu$ M) in aqueous medium. Images: Change in color of probes **3** and **4** upon interaction with different anions in aqueous medium (UV = 365 nm).

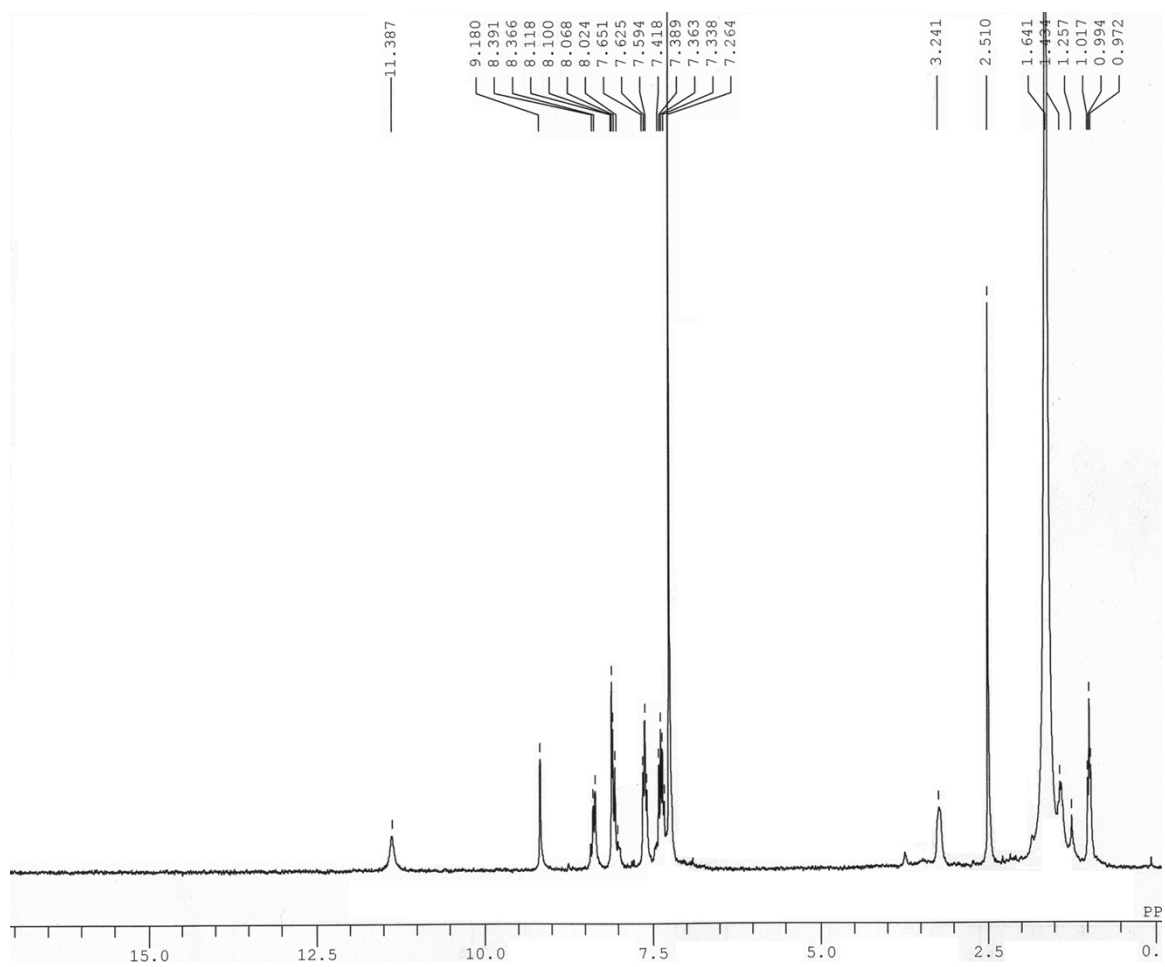

**Figure S15:**  $^1\text{H}$  NMR titration spectrum of **3** with 0.1 equiv of  $\text{F}^-$  in  $\text{CDCl}_3$ .



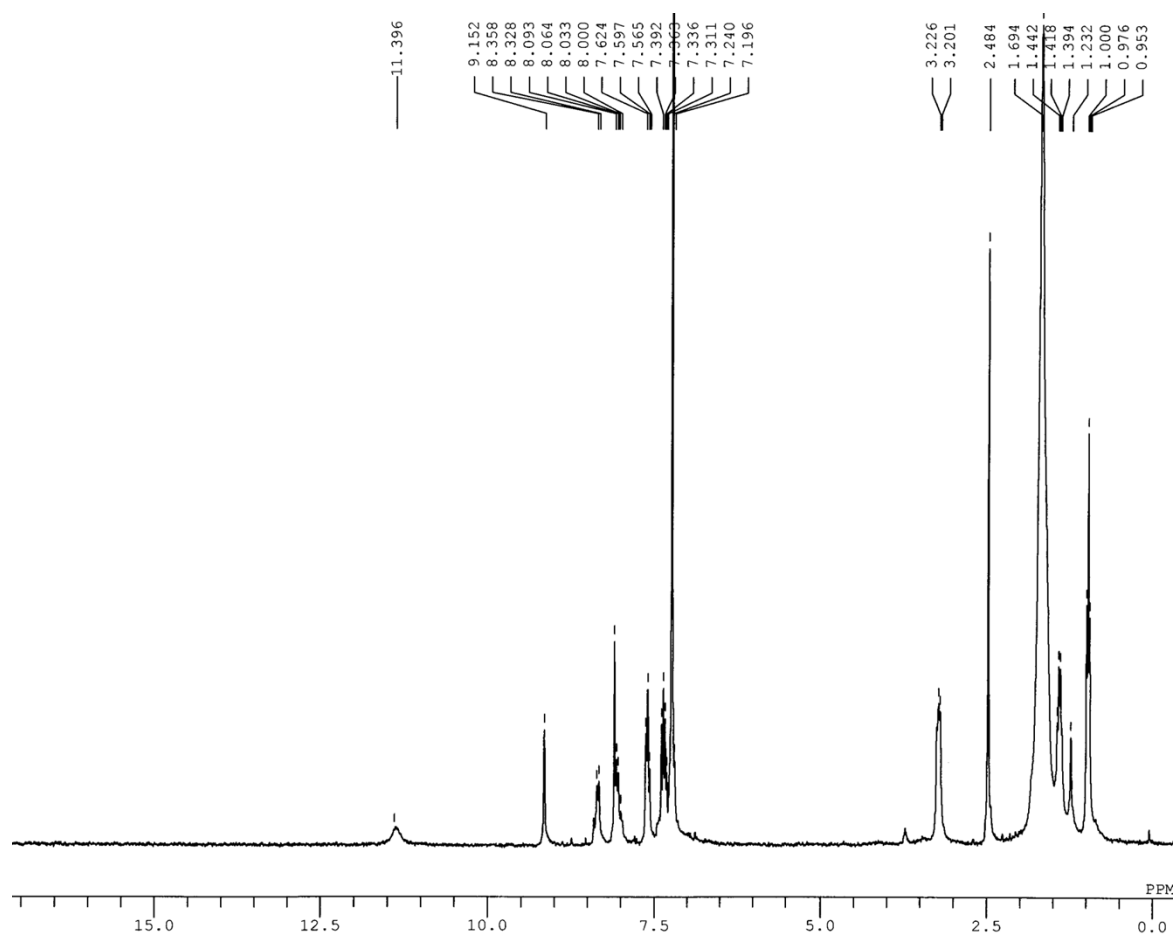

**Figure S16:** <sup>1</sup>H NMR titration spectrum of **3** with 0.2 equiv of F<sup>-</sup> in CDCl<sub>3</sub>.

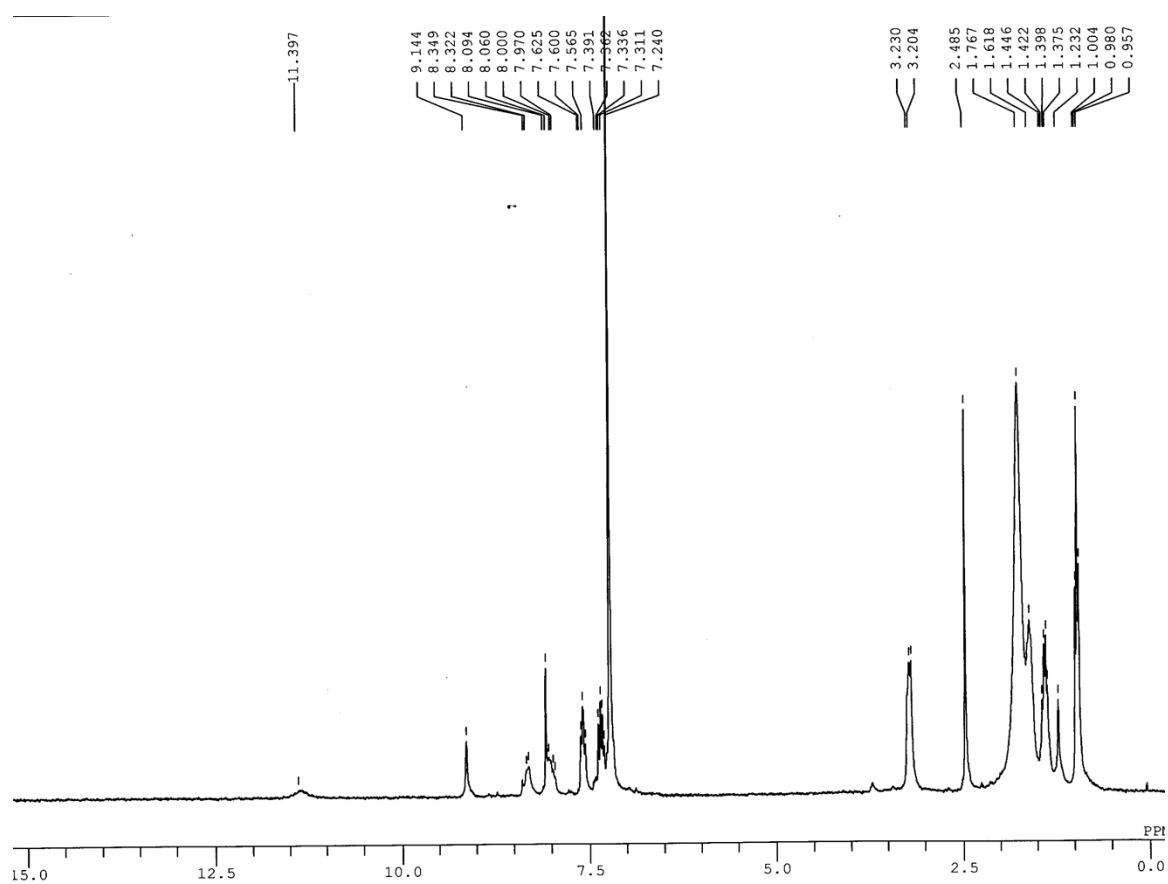

**Figure S17:**  $^1\text{H}$  NMR titration spectrum of **3** with 0.3 equiv of  $\text{F}^-$  in  $\text{CDCl}_3$ .

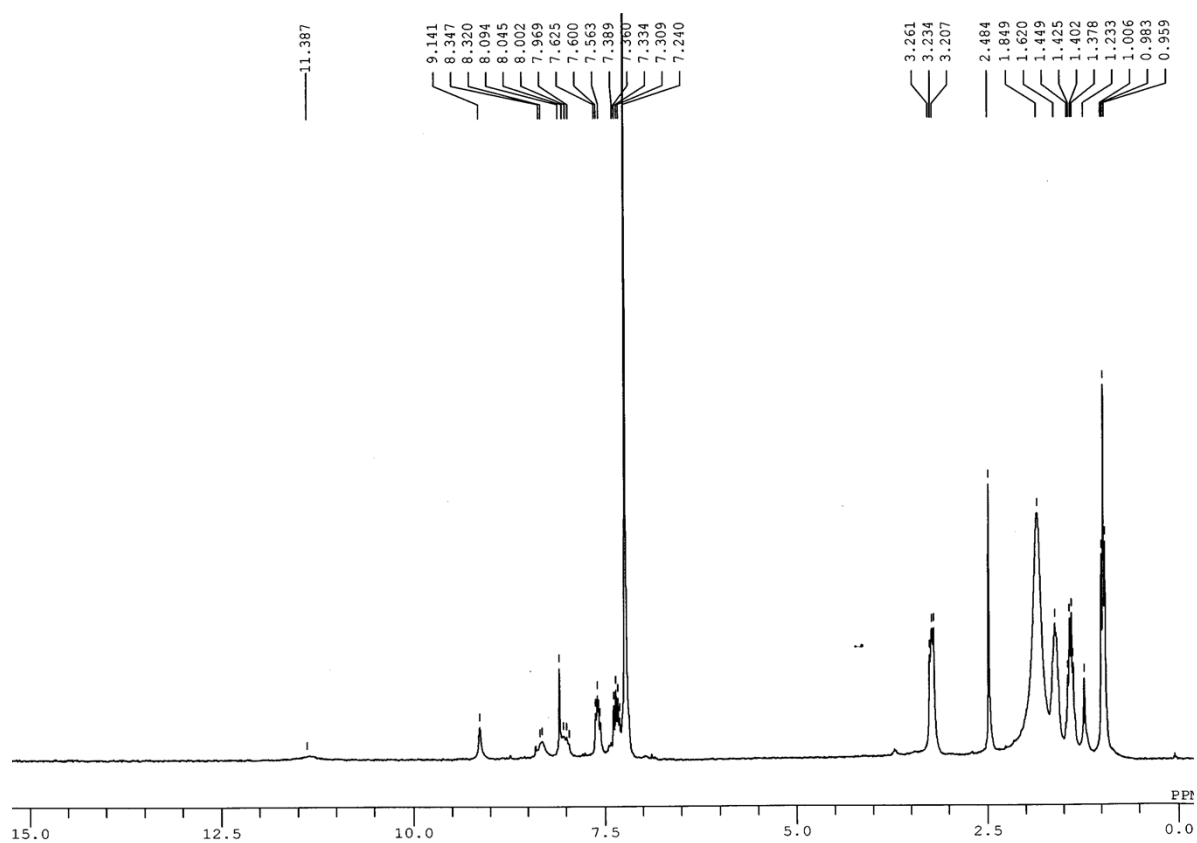

**Figure S18:**  $^1\text{H}$  NMR titration spectrum of **3** with 0.4 equiv of  $\text{F}^-$  in  $\text{CDCl}_3$ .

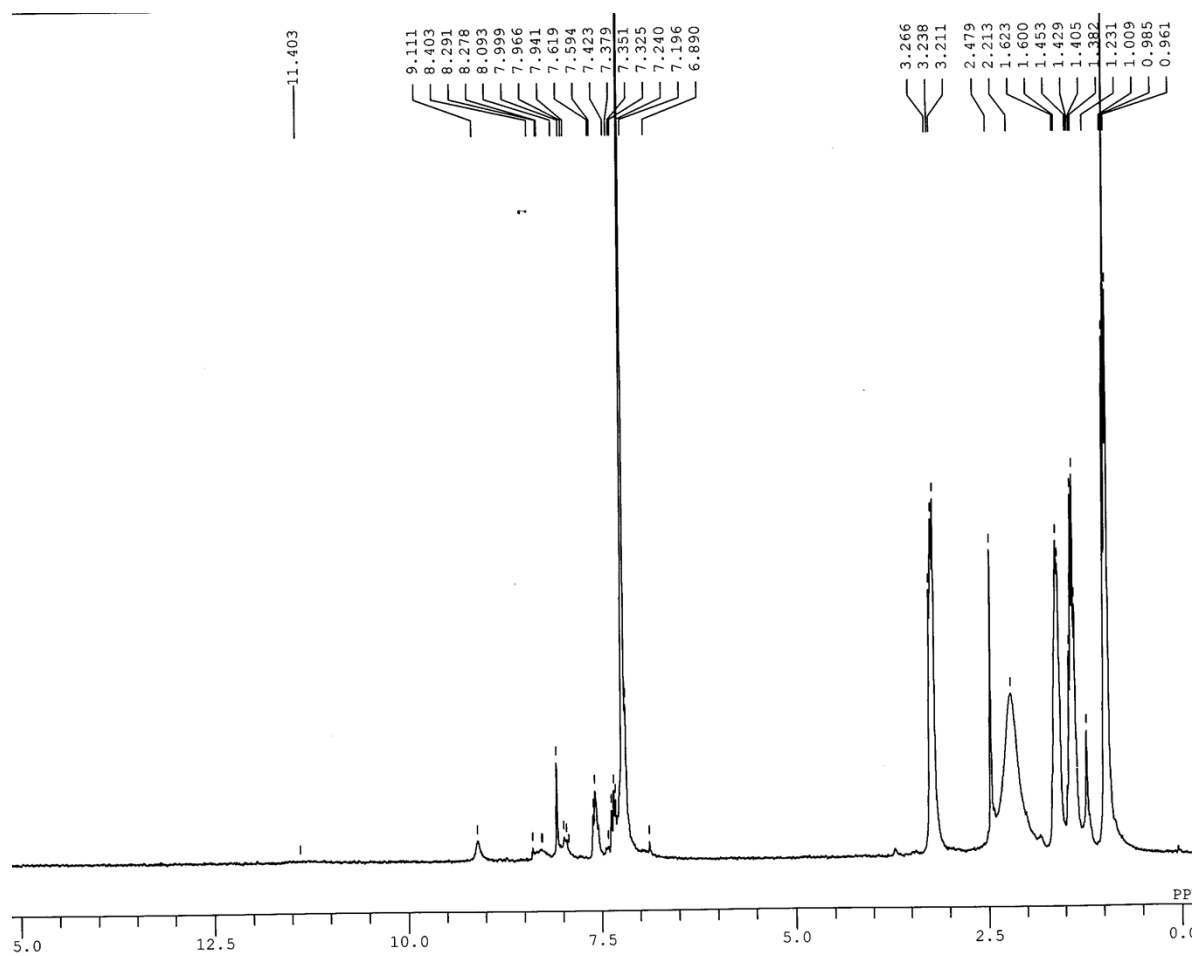

**Figure S19:**  $^1\text{H}$  NMR titration spectrum of **3** with 0.6 equiv of  $\text{F}^-$  in  $\text{CDCl}_3$ .

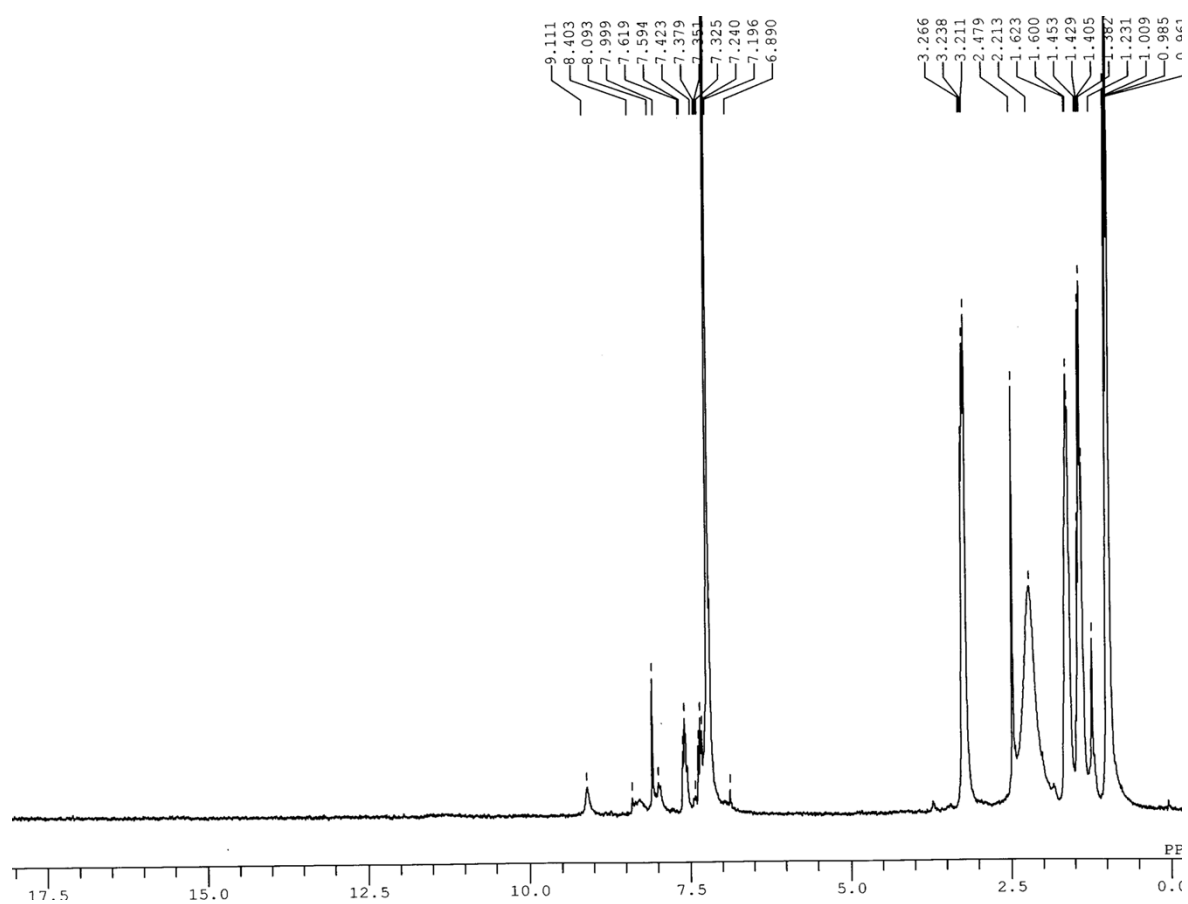

**Figure S20:**  $^1\text{H}$  NMR titration spectrum of **3** with 0.8 equiv of  $\text{F}^-$  in  $\text{CDCl}_3$ .

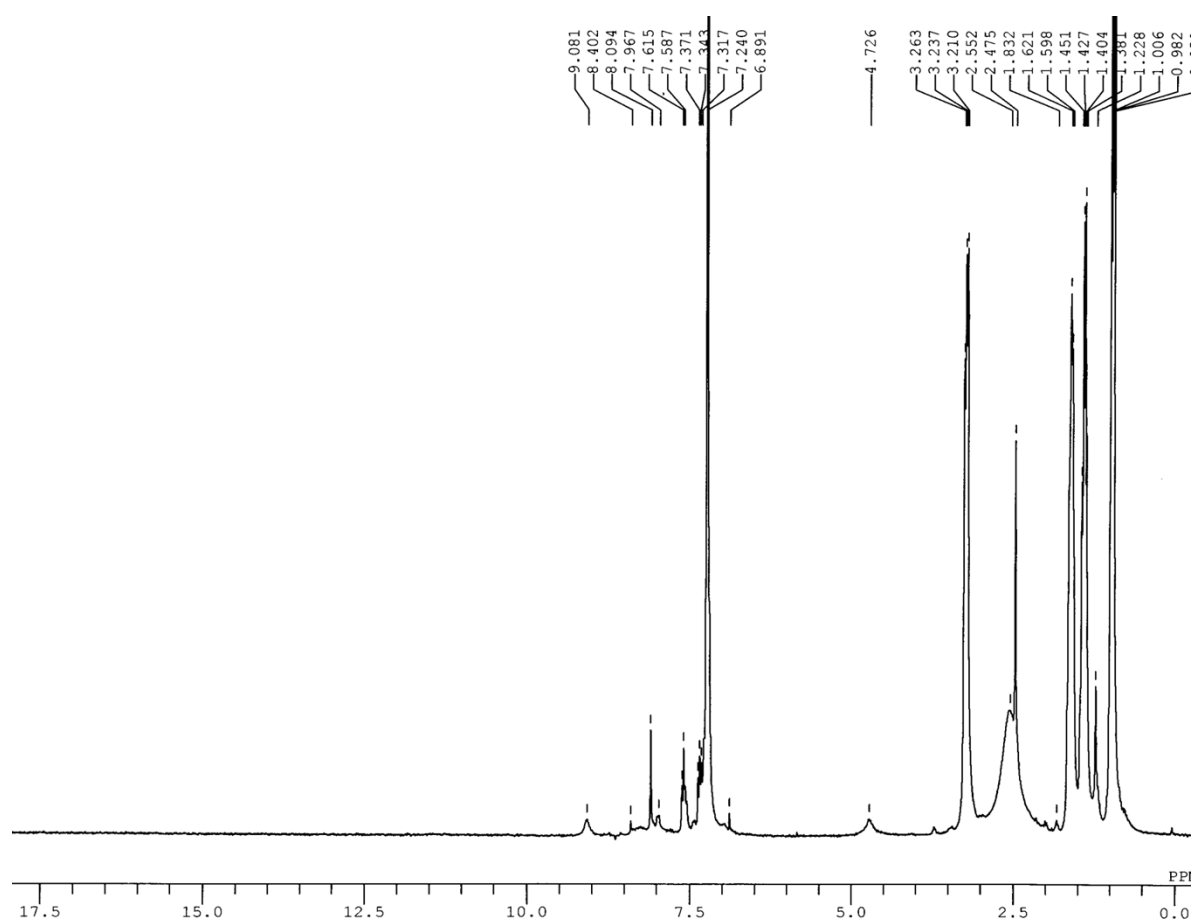

**Figure S21:**  $^1\text{H}$  NMR titration spectrum of **3** with 1.2 equiv of  $\text{F}^-$  in  $\text{CDCl}_3$ .

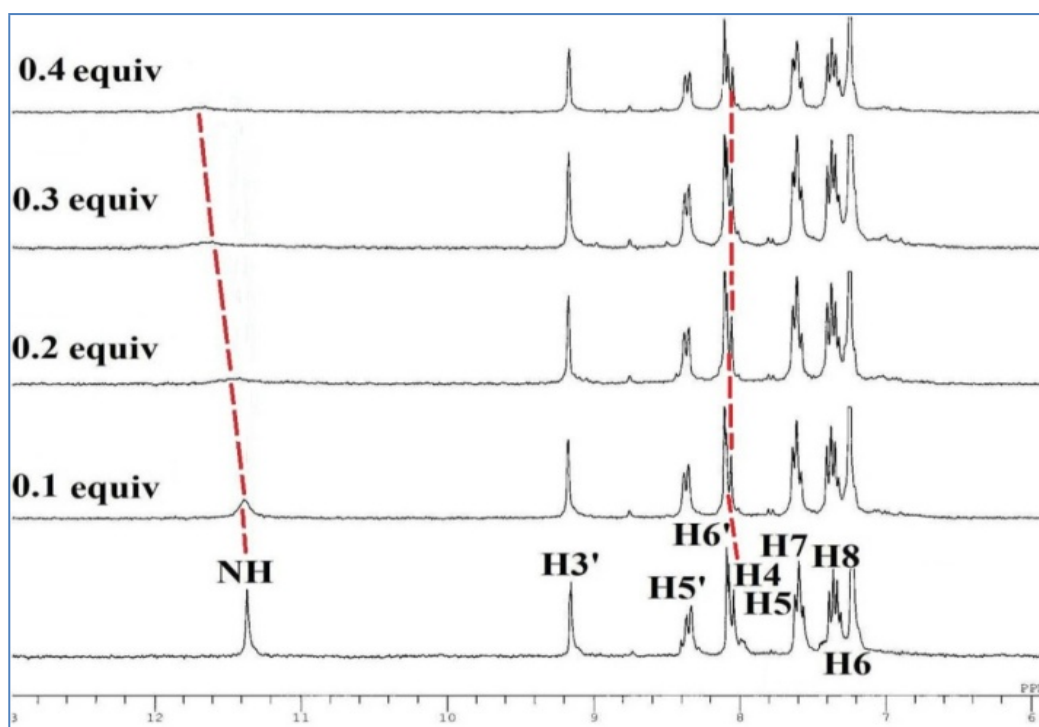

**Figure S22:** Stacked <sup>1</sup>H NMR titration spectra of **3** upon addition of AcO<sup>-</sup> (0, 0.1, 0.2, 0.3, and 0.4 equiv) in CDCl<sub>3</sub>.

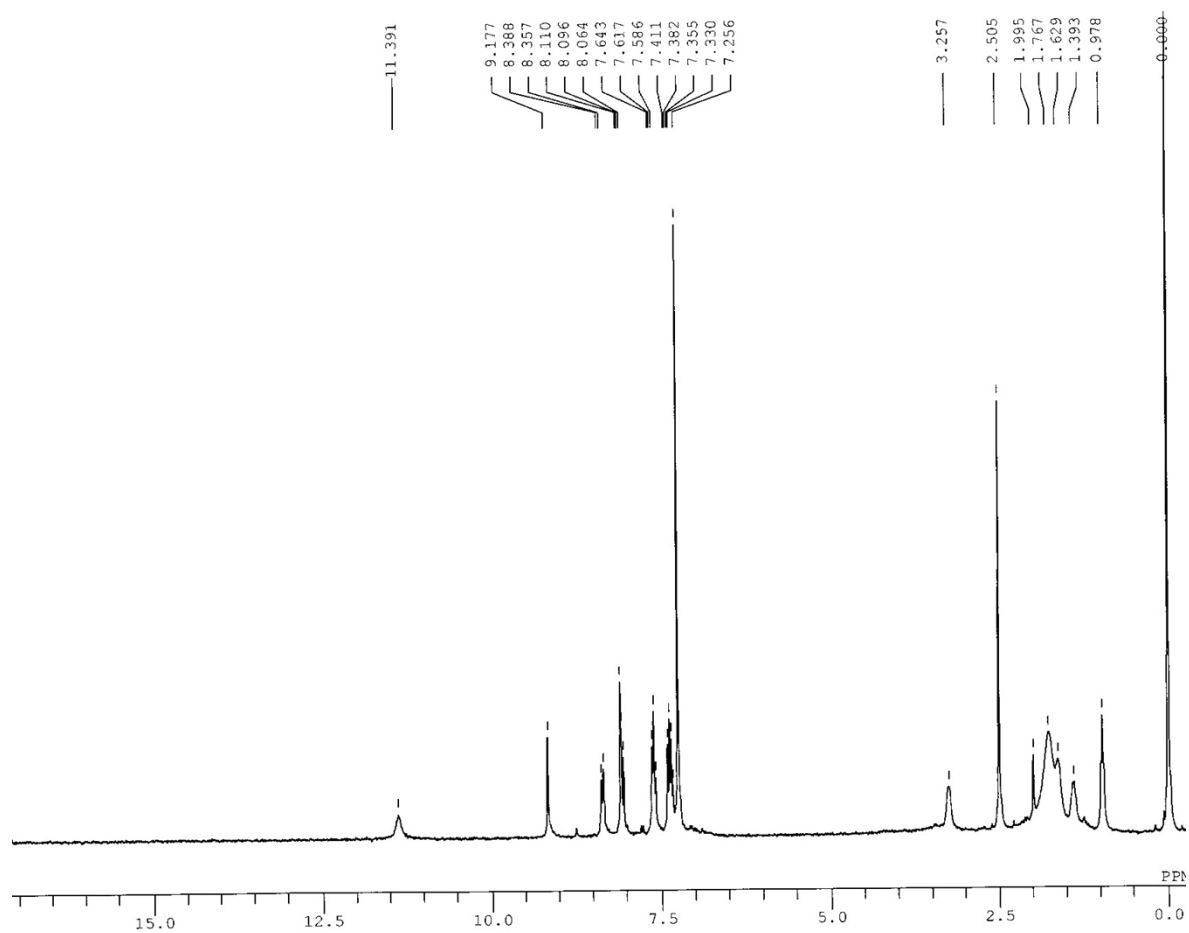

**Figure S23:**  $^1\text{H}$  NMR titration spectrum of **3** with 0.1 equiv of  $\text{AcO}^-$  in  $\text{CDCl}_3$ .



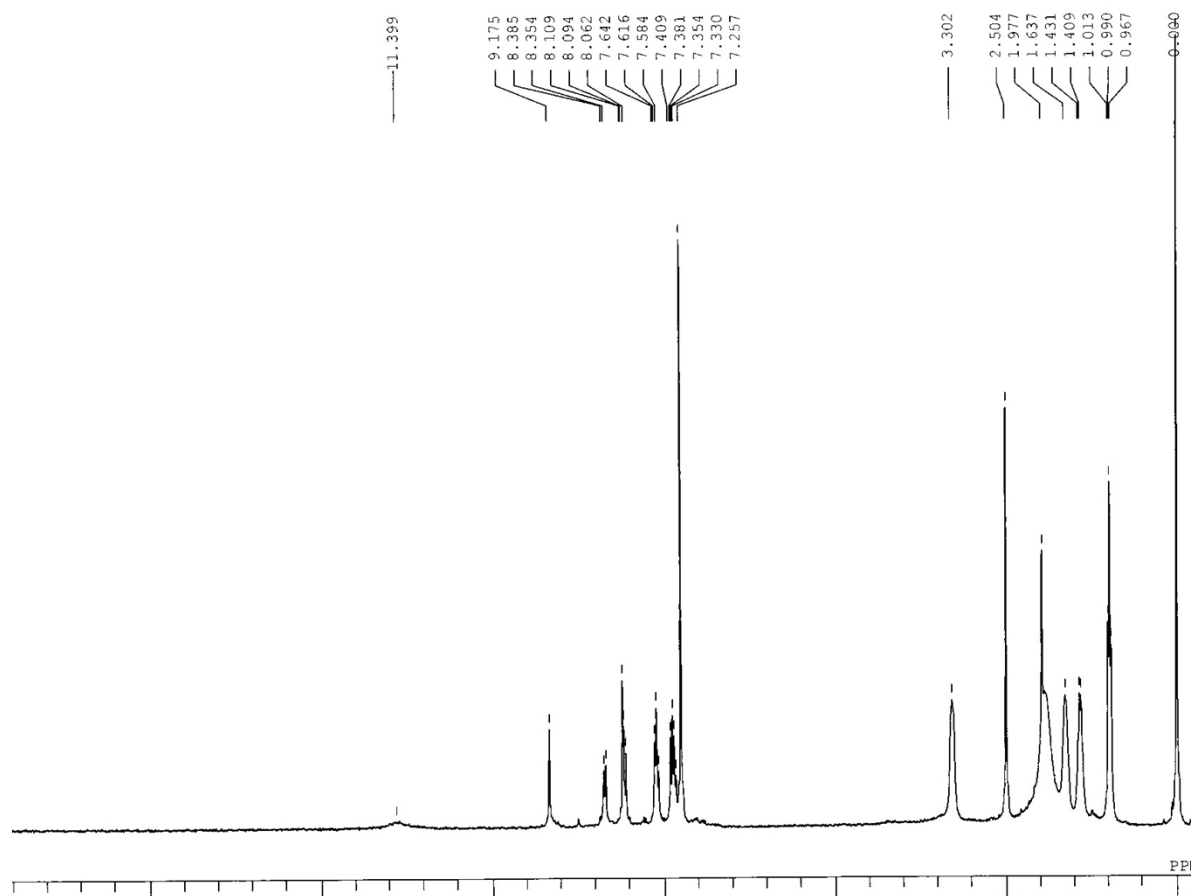

**Figure S24:**  $^1\text{H}$  NMR titration spectrum of **3** with 0.2 equiv of  $\text{AcO}^-$  in  $\text{CDCl}_3$ .

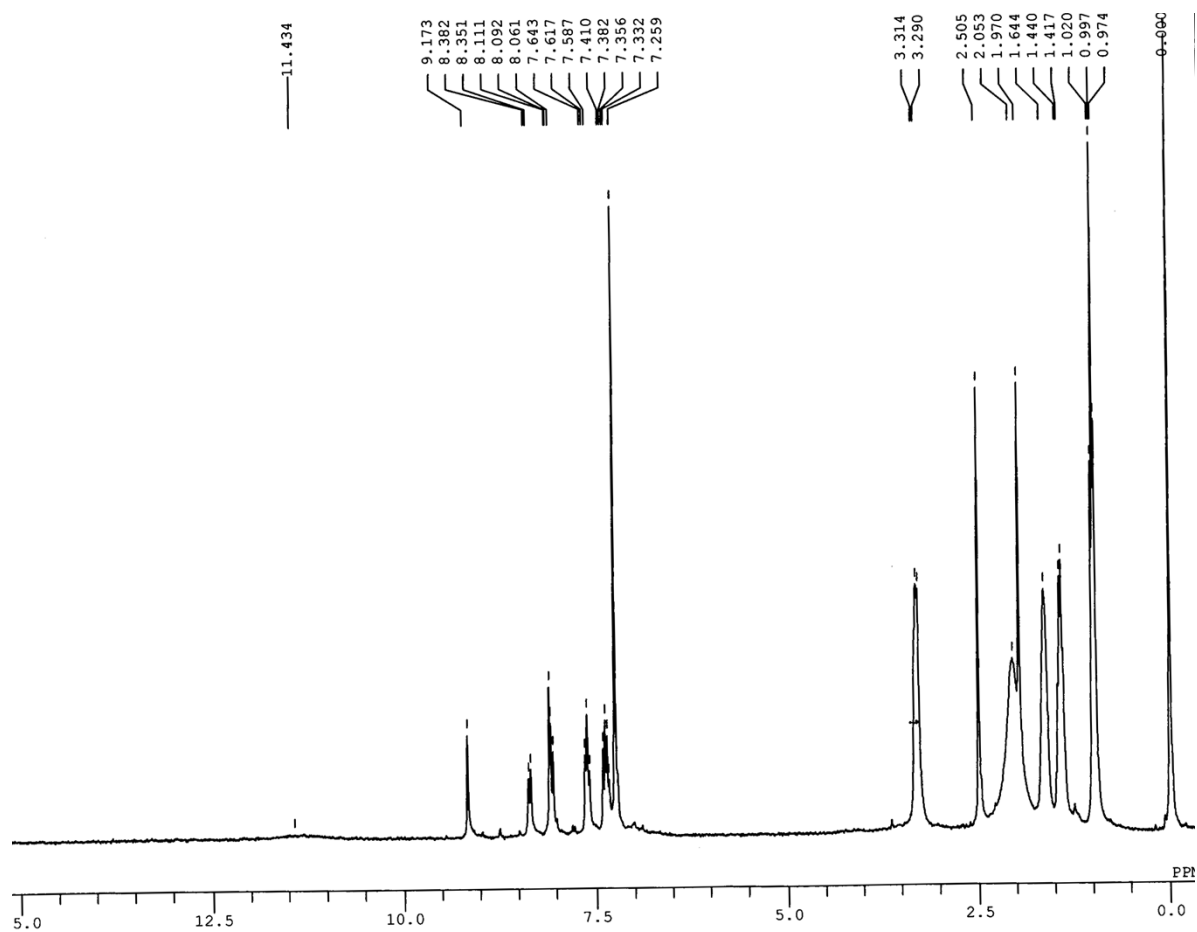

**Figure S25:** <sup>1</sup>H NMR titration spectrum of **3** with 0.3 equiv of AcO<sup>-</sup> in CDCl<sub>3</sub>.

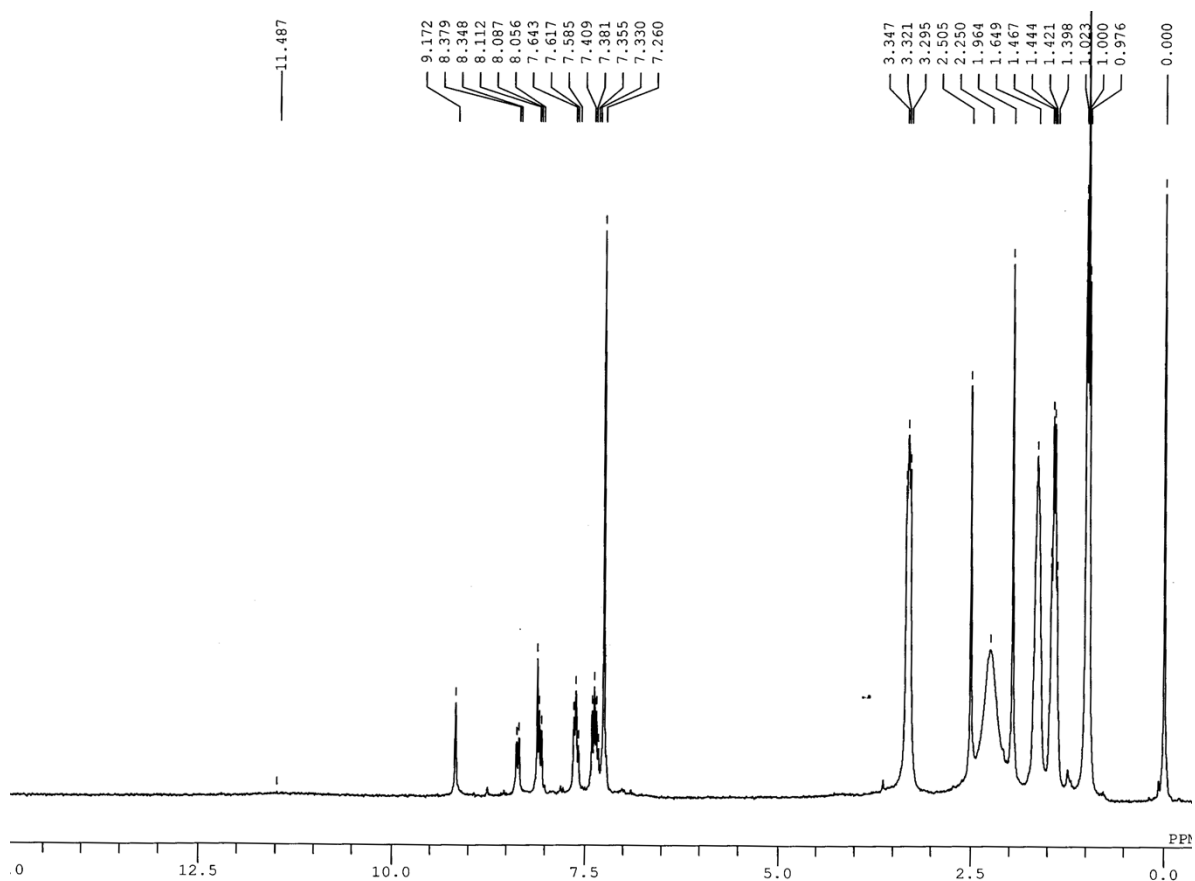

**Figure S26:**  $^1\text{H}$  NMR titration spectrum of **3** with 0.4 equiv of  $\text{AcO}^-$  in  $\text{CDCl}_3$ .

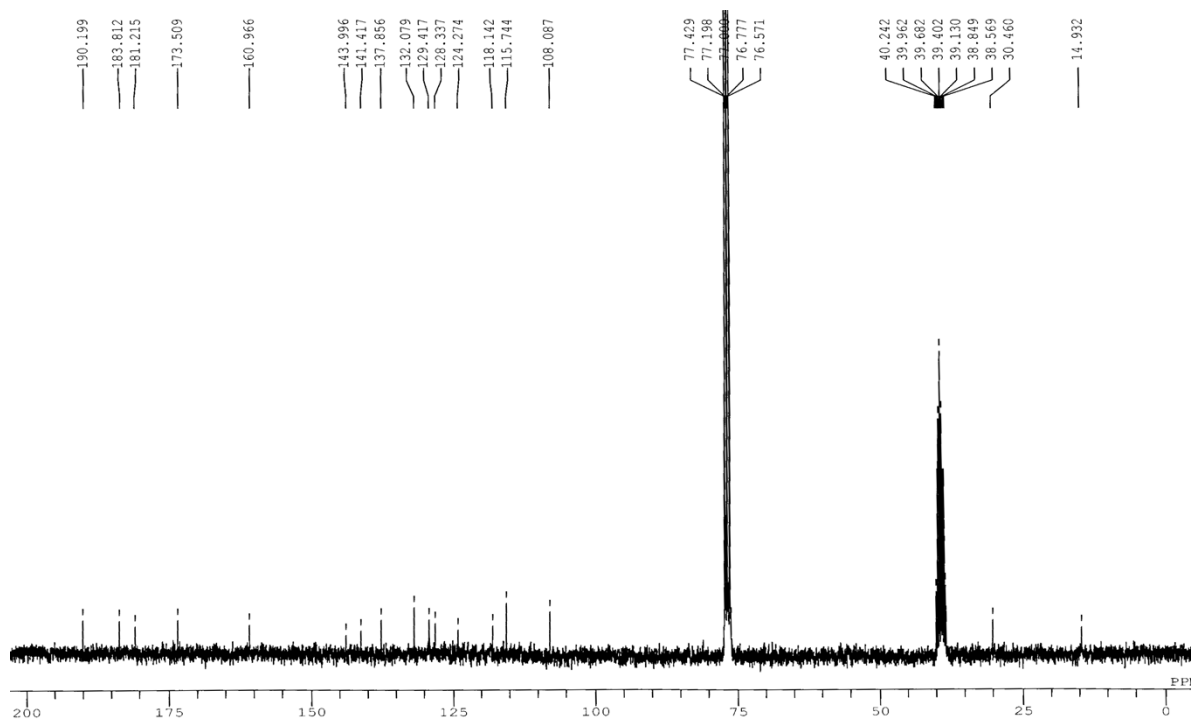

**Figure S27:**  $^{13}\text{C}$  NMR spectrum of adduct, **3-CN** $^-$  in  $\text{CDCl}_3/\text{DMSO-}d_6$ .

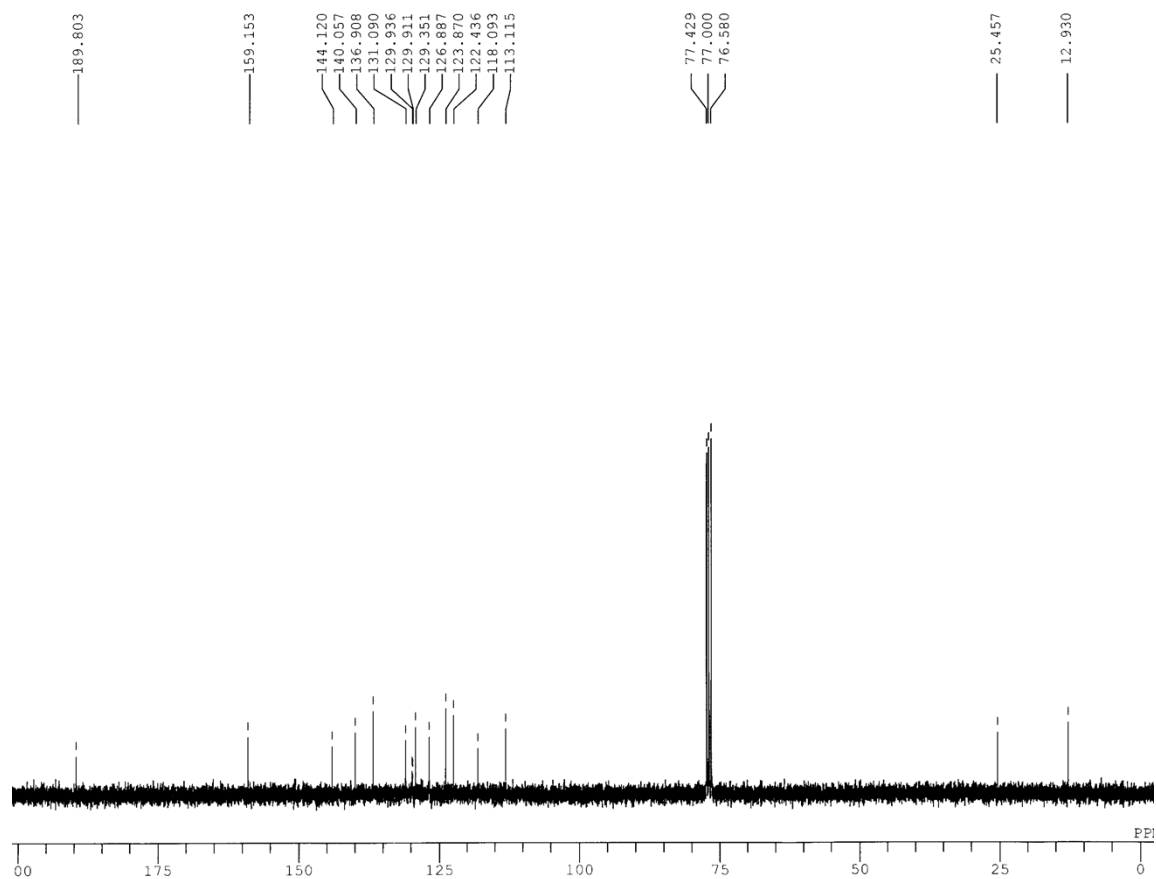

**Figure S28:**  $^{13}\text{C}$ NMR spectrum of adduct, 4-CN $^-$  in  $\text{CDCl}_3$ .

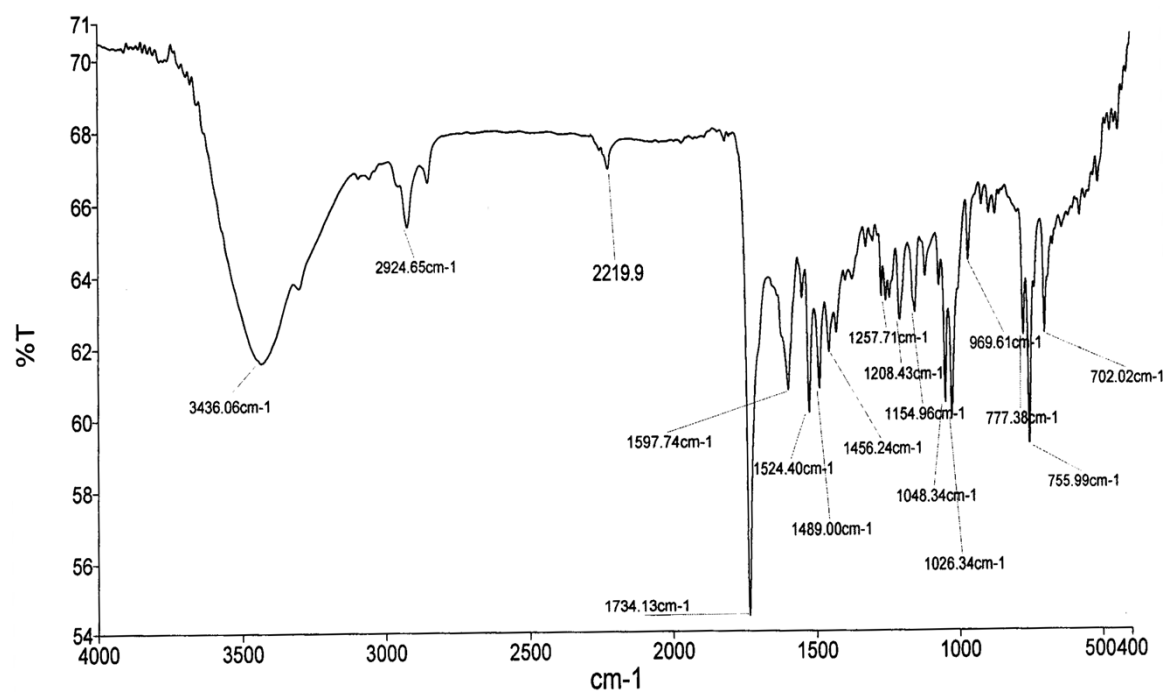

**Figure S29:** FTIR spectrum of adduct, 3-CN $^-$ .

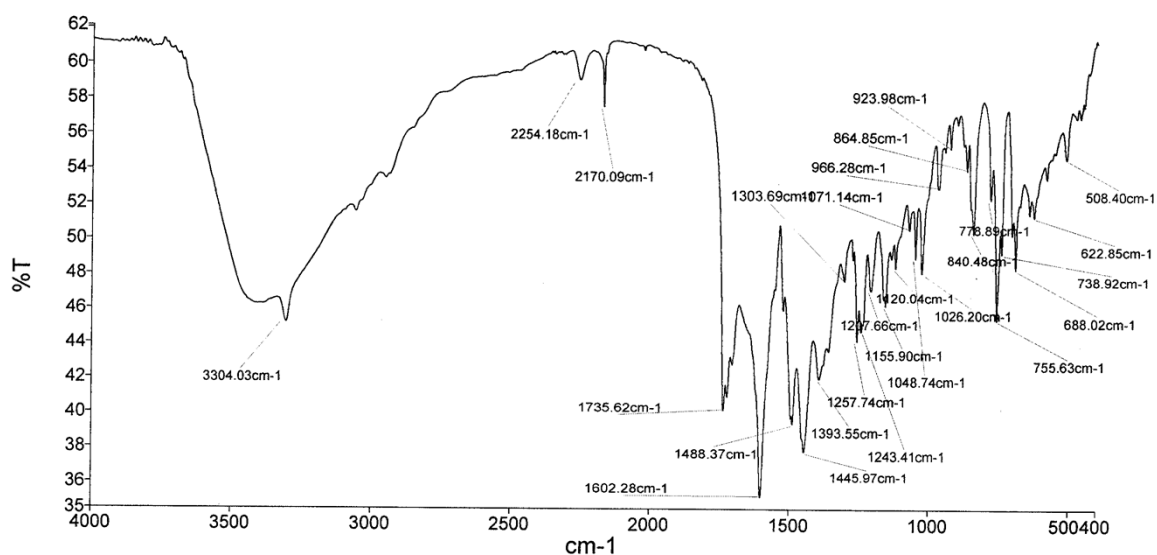

**Figure S30:** FTIR spectrum of adduct, 4-CN<sup>-</sup>.

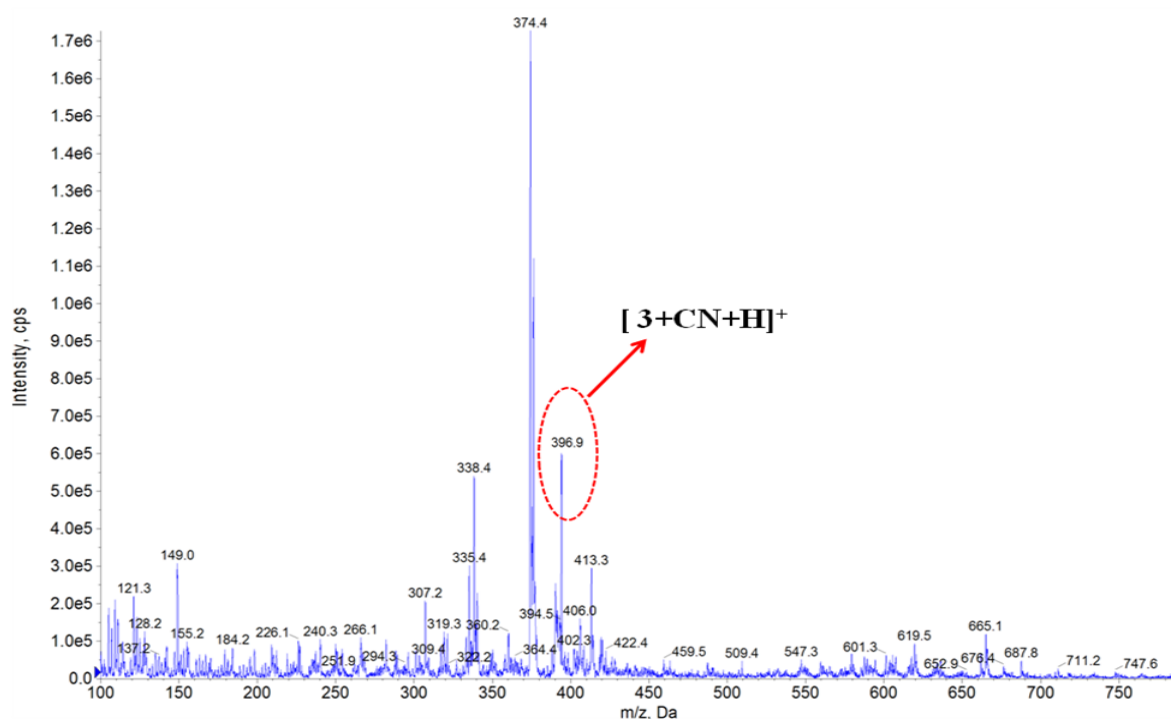

**Figure S31:** Mass spectrum (ESI-MS) of 3-CN.

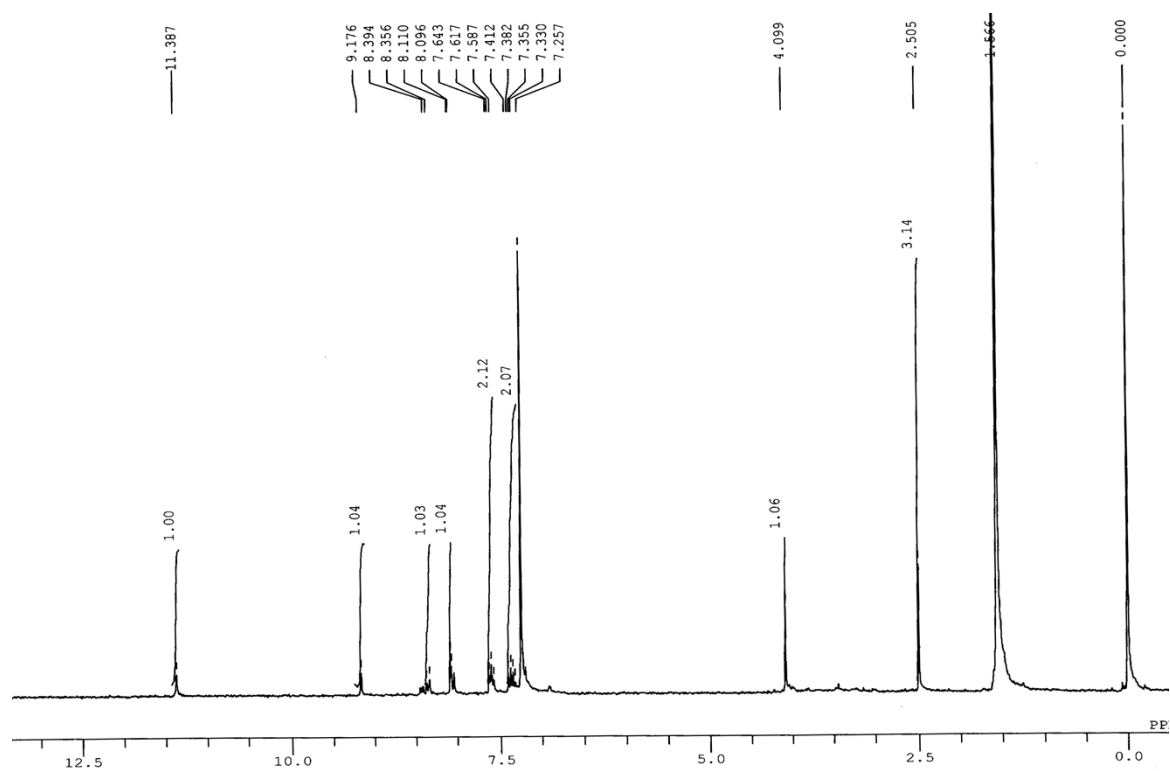

**Figure S32:** <sup>1</sup>H NMR spectrum of adduct, **3-CN**.

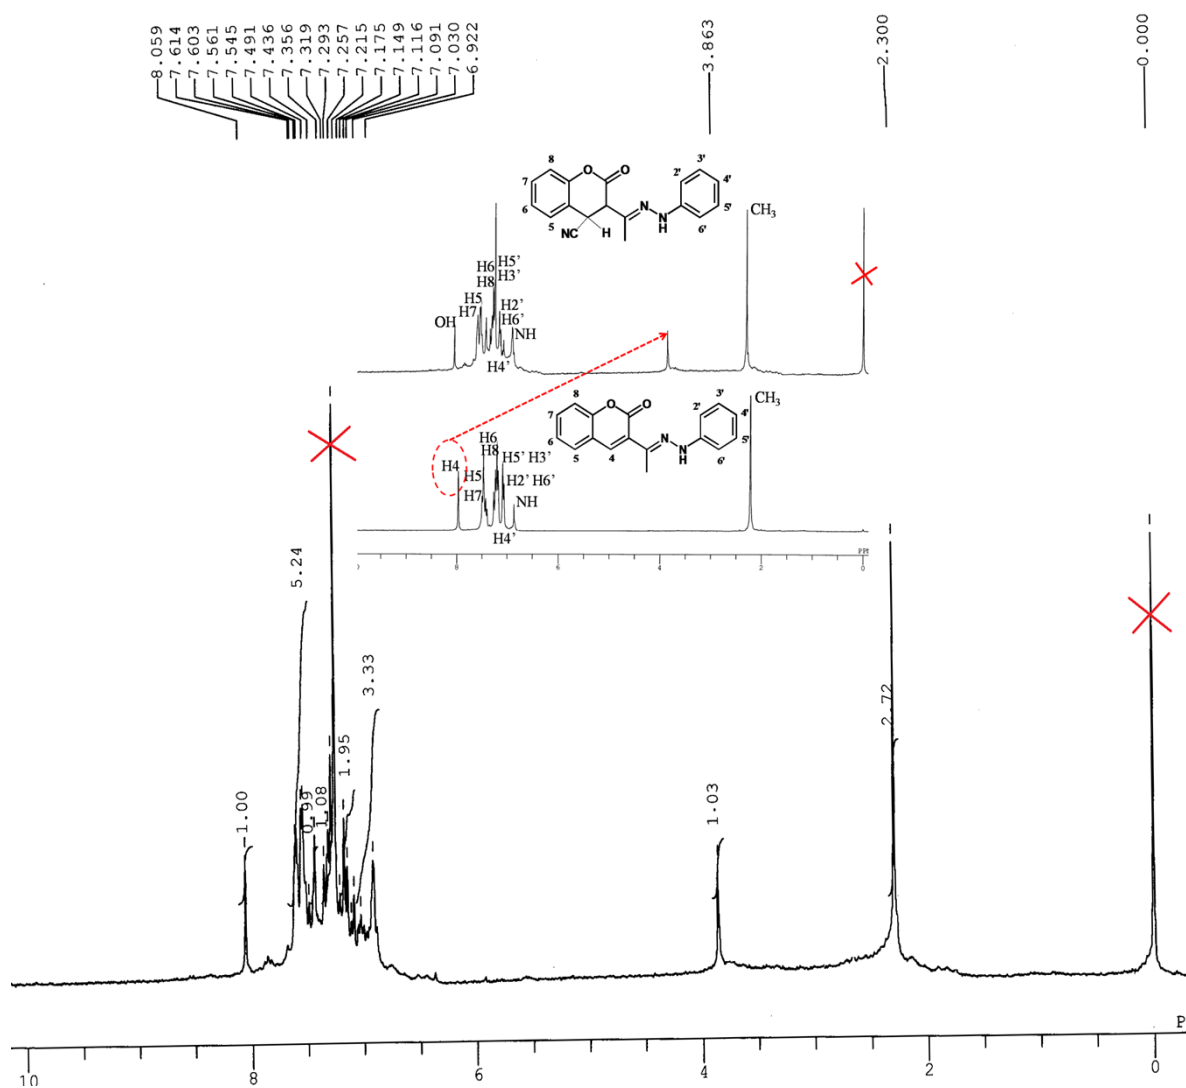

**Figure S33:**  $^1\text{H}$ NMR spectrum of adduct, **4-CN-**. Inset: stacked  $^1\text{H}$ -NMR spectra of **4** and **4-CN-**.

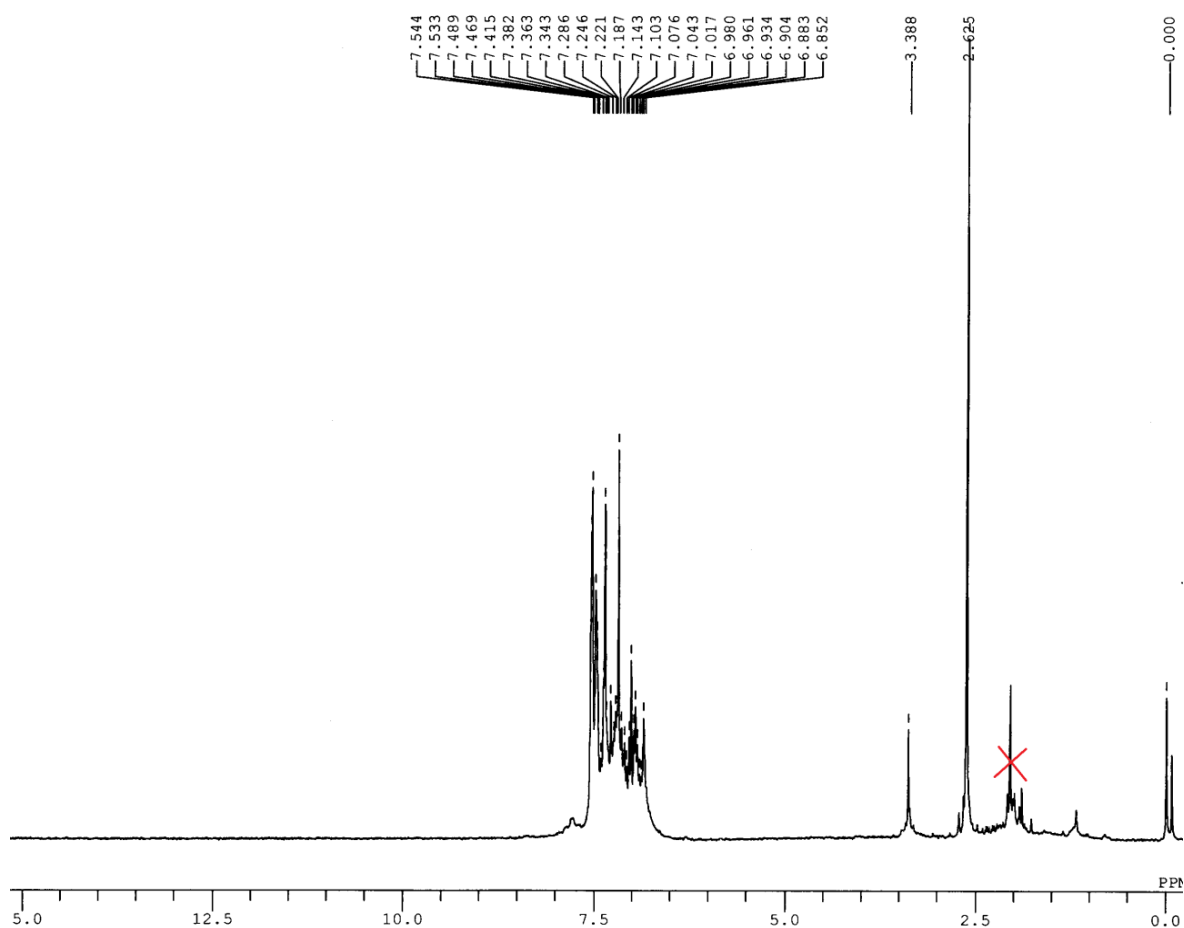

**Figure S34:** D<sub>2</sub>O exchange <sup>1</sup>H NMR spectrum of adduct, 4-CN<sup>-</sup>.

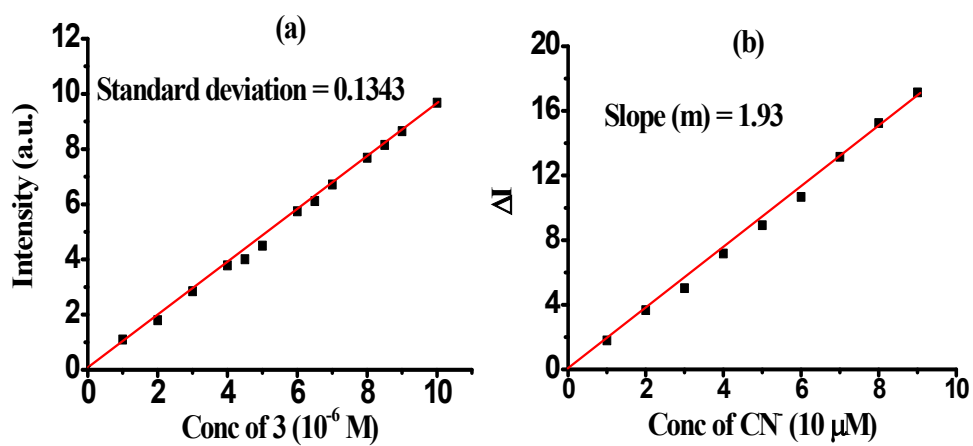

**Figure S35:** (a) Calibration curve for **3**, (b) calibration sensitivity for CN<sup>-</sup> in H<sub>2</sub>O.



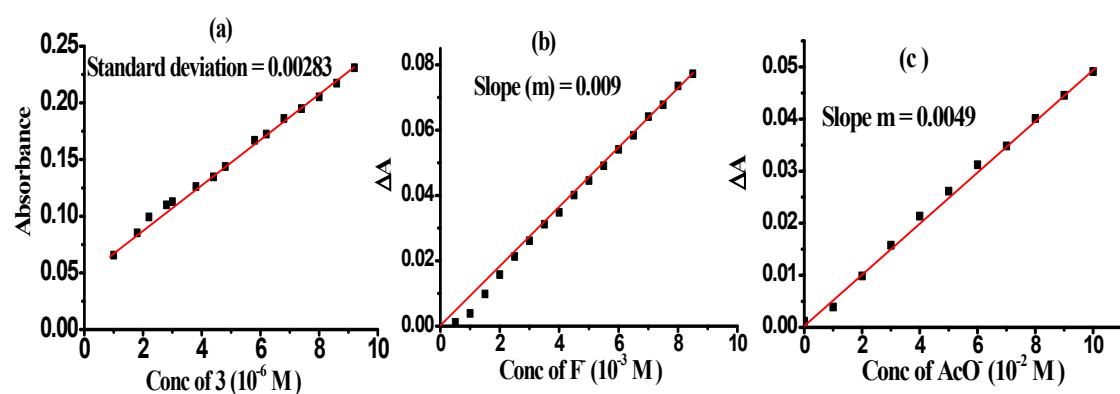

**Figure S36:** (a) Calibration curve for **3**, (b) and (c) calibration sensitivities for  $F^-$  and  $AcO^-$  in MeCN.

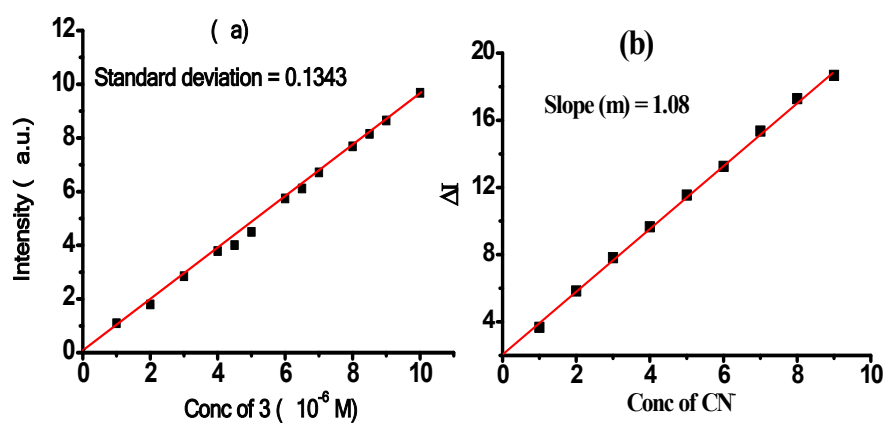

**Figure S37:** (a) Calibration curve for **3**, (b) calibration sensitivity for  $CN^-$  in human blood plasma.

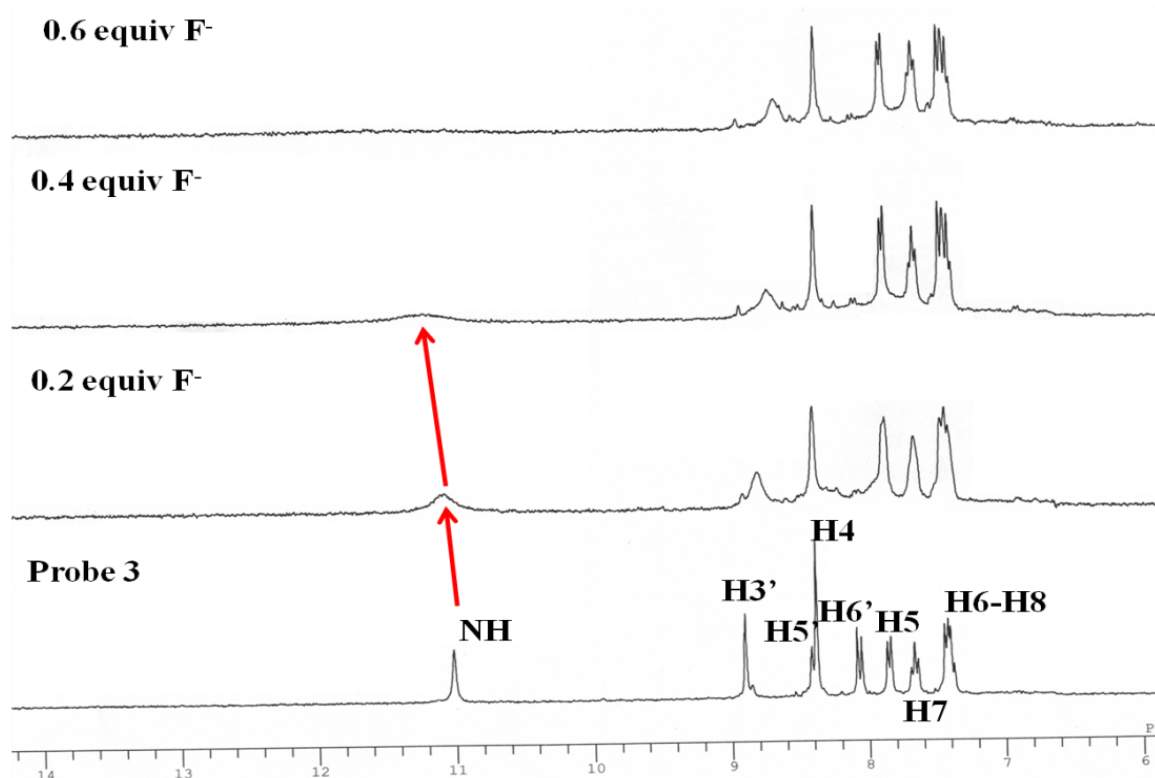

**Figure S38:** Stacked  $^1\text{H}$  NMR titration spectra of **3** upon addition of  $\text{F}^-$  (0, 0.2, 0.4 and 0.6 equiv) in DMSO.

Further, to prove the H-bonding or deprotonation,  $^1\text{H}$  NMR titration studies has been performed in  $\text{DMSO}-d_6$  ( $c = 2 \times 10^{-1} \text{ mol l}^{-1}$ ). In  $^1\text{H}$  NMR spectrum of **3** (Figure S38) singlet appeared at  $\delta$  11.017, 8.907 and 8.381 ppm are attributable to resonances of  $-\text{NH}$ ,  $\text{H3}'$  and  $\text{H4}$  protons while resonances at  $\delta$  8.423 (d,  $J = 2.4 \text{ Hz}$ ), 8.086 (d,  $J = 9.3 \text{ Hz}$ ), 7.866 (d,  $J = 7.8 \text{ Hz}$ ), 7.692 (t,  $J_1 = 7.5$ ,  $J_2 = 8.1 \text{ Hz}$ ), 7.444-7.376 (m) ppm are assignable to  $\text{H5}'$ ,  $\text{H6}'$ ,  $\text{H5}$ ,  $\text{H7}$ , and  $\text{H6}$   $\text{H8}$  protons respectively. Upon addition of 0.2 equiv. of  $\text{F}^-$  to a solution of **3**,  $-\text{NH}$  signal shifted toward downfield and appeared at 11.066 ppm (Figure S39) whereas  $\text{H3}'$ ,  $\text{H6}'$ ,  $\text{H7}$  protons shifted upfield and  $\text{H4}$ ,  $\text{H5}$ ,  $\text{H6-H8}$  protons shifted slightly downfield. However, upon increasing the concentration of  $\text{F}^-$  ions (0.4 equiv.) the  $-\text{NH}$  signal shifted downfield to appear at  $\delta$  11.232 ( $\Delta\delta = 0.215$ ) ppm while  $\text{H3}'$ ,  $\text{H6}'$ ,  $\text{H7}$ ,  $\text{H4}$  protons shifted upfield and  $\text{H5}$ ,  $\text{H6-H8}$  protons signal was shifted downfield to appear at  $\delta$  8.702, 8.084, 7.663, 8.354 and 7.871 and 7.445 ppm respectively (Figure S40) whereas  $\text{H5}'$  signal merged in  $\text{H4}$ . Further, increasing the concentration of  $\text{F}^-$  (0.6 equiv) to a solution of **3**,  $-\text{NH}$  signal broadened and disappeared while  $\text{H4}$  shifted toward upfield,  $\delta = 8.329$  ( $\Delta\delta = 0.052$ ) ppm and all the ring protons shifted upfield region (Figure S41). Thus, suggested about the possibility of H-bonding interaction between **3** and  $\text{F}^-$  involving  $\text{H4}$  and  $-\text{NH}$  protons.

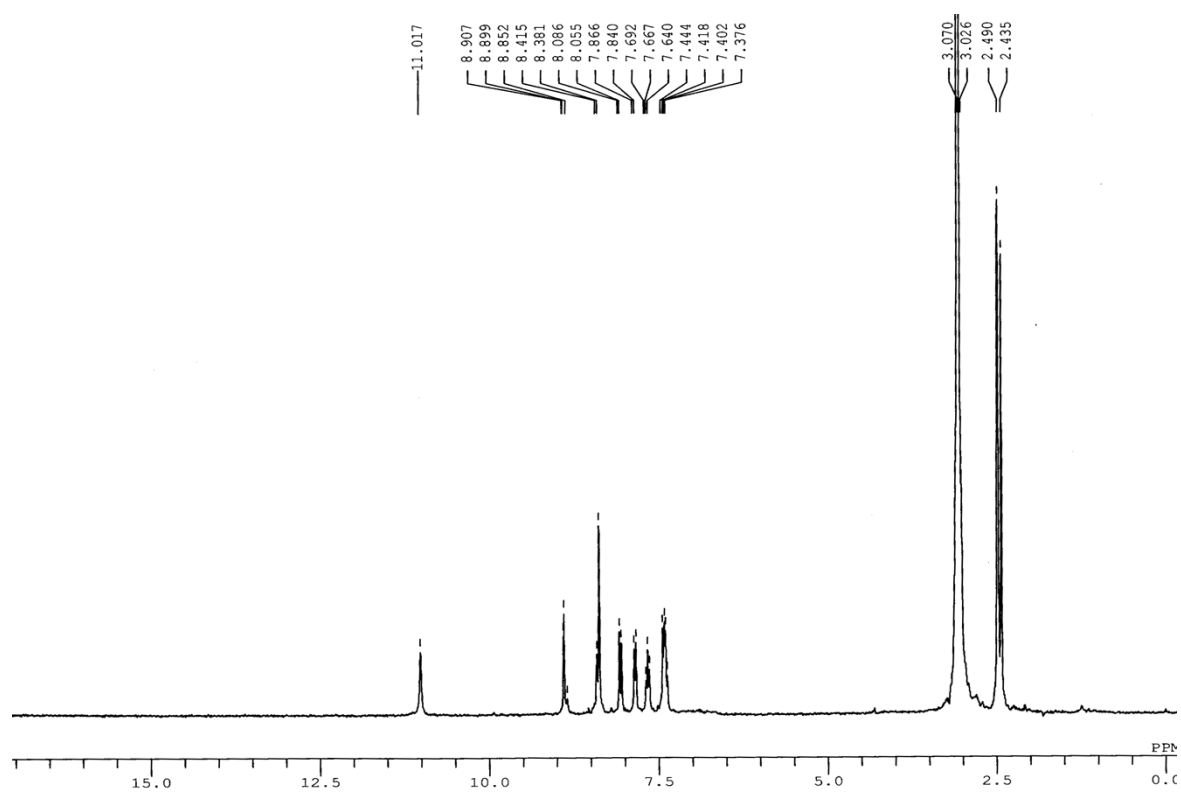

**Figure S39:**  $^1\text{H}$  NMR spectrum of **3** in  $\text{DMSO}-d_6$ .

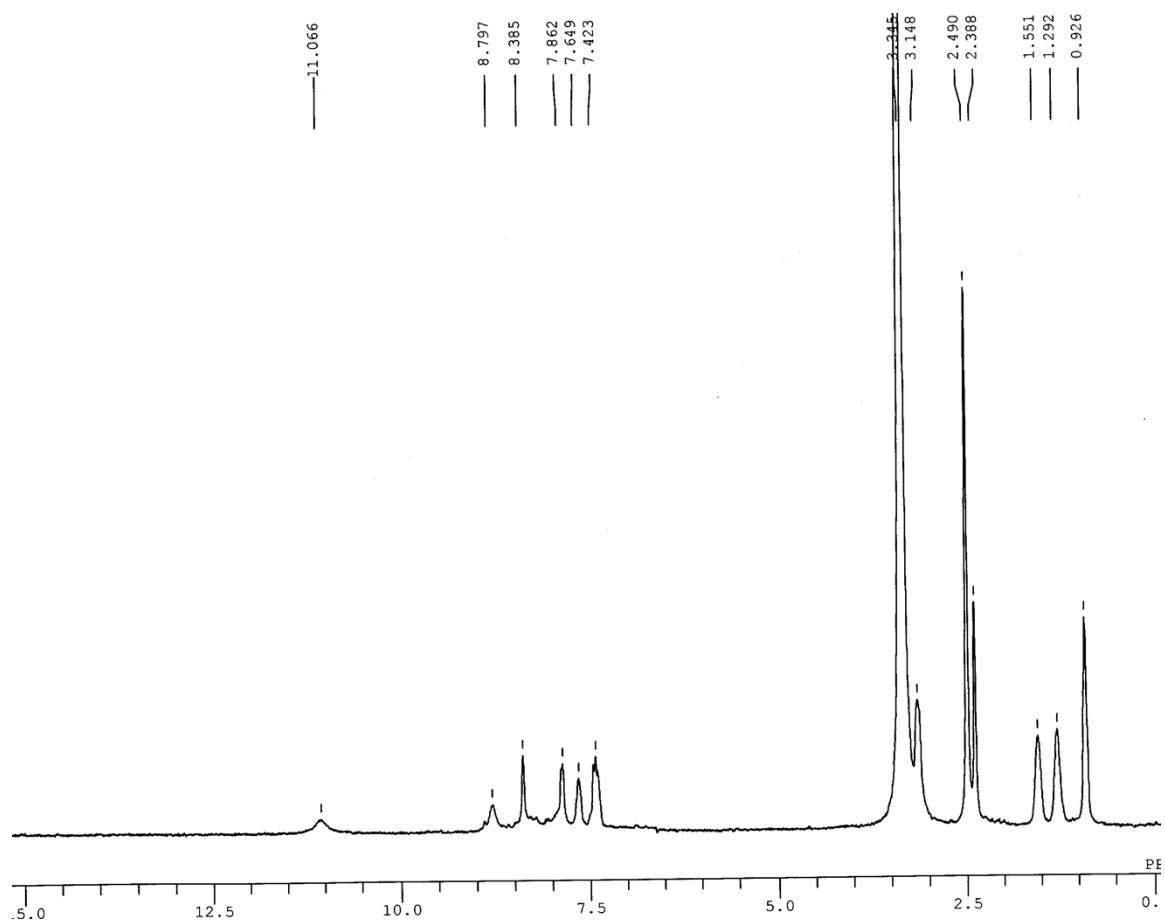

**Figure S40:**  $^1\text{H}$  NMR titration spectrum of **3** with 0.2 equiv of  $\text{F}^-$  in  $\text{DMSO-}d_6$ .

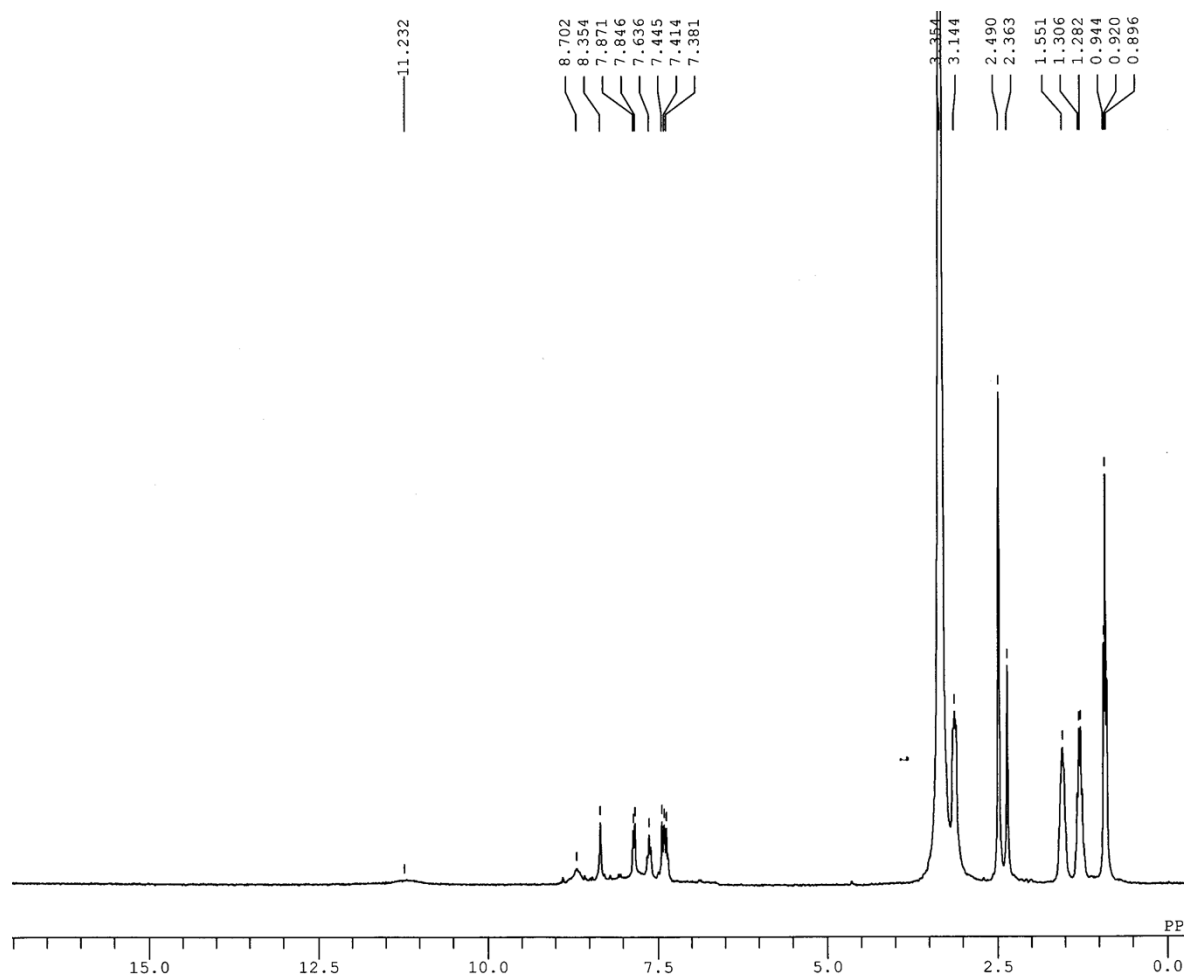

**Figure S41:**  $^1\text{H}$  NMR titration spectrum of **3** with 0.4 equiv of  $\text{F}^-$  in  $\text{DMSO}-d_6$ .

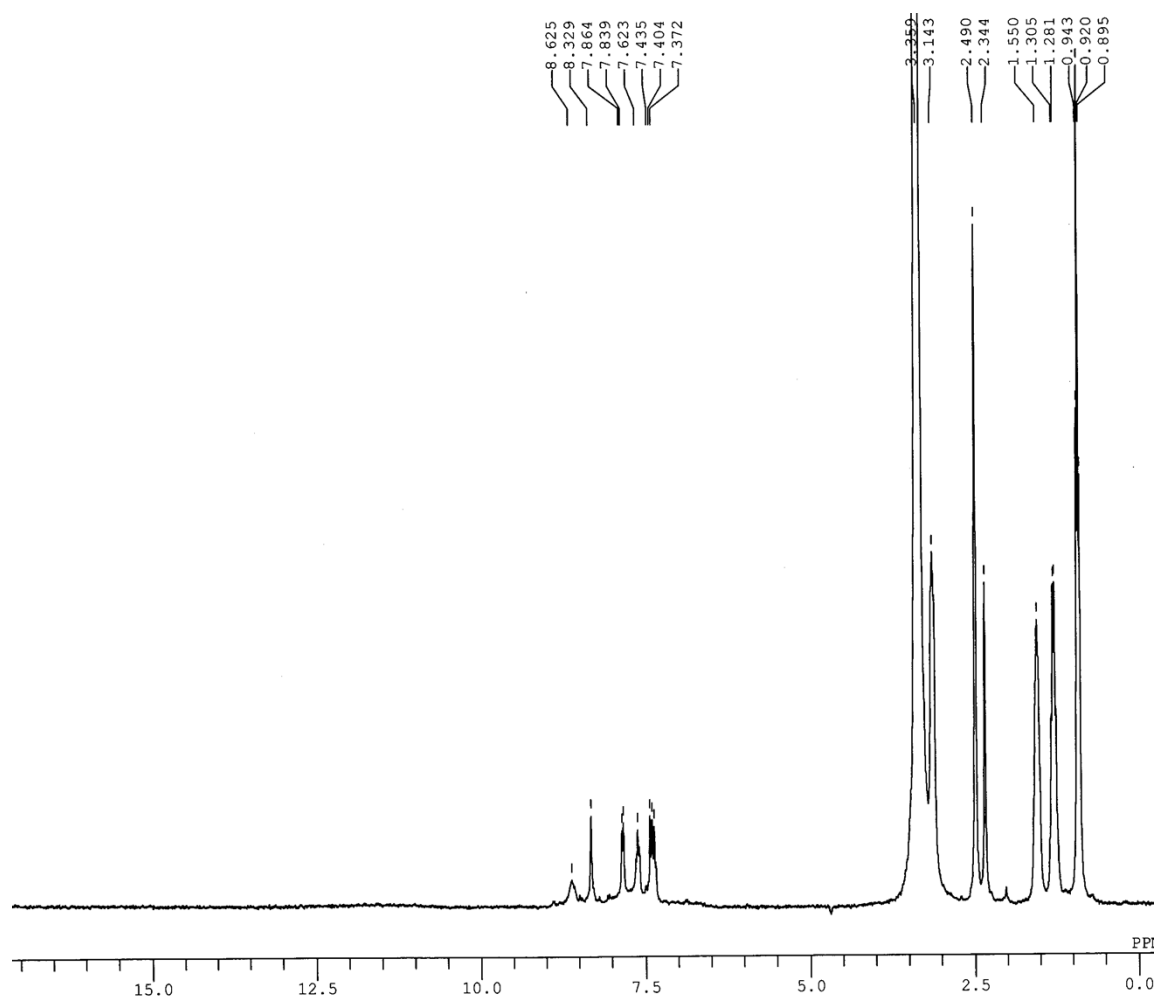

**Figure S42:**  $^1\text{H}$  NMR titration spectrum of **3** with 0.6 equiv of  $\text{F}^-$  in  $\text{DMSO}-d_6$ .
